# Supplementary material
Source: publisher figshare collection journal article supplement (https://acs.figshare.com/ndownloader/files/5768142)
Supplement: Supplementary file 1 [file 5768142]

# ja994051b.cif

#===CIF Files for 2 at 100 K, 213 K and 300 K===========

data_global

_publ_contact_author_name            'F.A. Cotton'
_publ_contact_author_address         
; Dept. of Chemistry
  P.O. Box 30012
  Texas A&M University
  College Station, TX 77842-3012
  USA
;
_publ_contact_author_email           cotton@tamu.edu
_publ_contact_author_fax             '(409) 845 9351'
_publ_contact_author_phone           '(409) 845 4432'

_publ_contact_letter
; Please consider this CIF file as supplementary material for J. Am. Chem. Soc.  
;
   
_publ_requested_journal              'J. Am. Chem. Soc.'


# TITLE AND AUTHOR LIST

_publ_section_title
; 
A New Linear Tricobalt Compound with di-(2-pyridyl)amide (dpa) Ligands:
Structural and Magnetic Properties, Including Two-Step Spin Crossover, of
[Co3(dpa)4Cl2][BF4]
;

loop_
	_publ_author_name
	_publ_author_address
 'Clerac, Rodolphe'                                 

; Dept. of Chemistry
  P.O. Box 30012
  Texas A&M University
  College Station, TX 77842-3012, USA

;
 'Cotton, F. Albert'                                 

; Laboratory for Molecular Structure and Bonding
  Dept. of Chemistry 
  Texas A&M University, P.O. Box 30012
  College Station, TX 77842-3012, USA
;

 'Dunbar, Kim R.'                                 

; Dept. of Chemistry
  P.O. Box 30012
  Texas A&M University
  College Station, TX 77842-3012
  USA

;
 'Lu, Tongbu'

; Laboratory for Molecular Structure and Bonding
  Dept. of Chemistry 
  Texas A&M University, P.O. Box 30012
  College Station, TX 77842-3012, USA
;
'Murillo, Carlos M.'

; Laboratory for Molecular Structure and Bonding
  Dept. of Chemistry 
  Texas A&M University, P.O. Box 30012
  College Station, TX 77842-3012, USA
;
 'Wang, Xiaoping'

; Laboratory for Molecular Structure and Bonding
  Dept. of Chemistry 
  Texas A&M University, P.O. Box 30012
  College Station, TX 77842-3012, USA
;


#===JA994051B-15-278===CIF for 2 at 100 K======Cotton, F. A. et al=============
data_100K 
 
_audit_creation_method            SHELXL 
_chemical_name_systematic 
; 
 ? 
; 
_chemical_name_common             ? 
_chemical_formula_moiety          ? 
_chemical_formula_structural      '[Co3(dpa)4Cl2][BF4]1.5CH2Cl2' 
_chemical_formula_analytical      ? 
_chemical_formula_sum             'C41.50 H35 B Cl5 Co3 F4 N12' 
_chemical_formula_weight          1142.67 
_chemical_melting_point           ? 
_chemical_compound_source         synthesis 
 
loop_ 
 _atom_type_symbol 
 _atom_type_description 
 _atom_type_scat_dispersion_real 
 _atom_type_scat_dispersion_imag 
 _atom_type_scat_source 
 'C'  'C'   0.0033   0.0016 
 'International Tables Vol C Tables 4.2.6.8 and 6.1.1.4' 
 'H'  'H'   0.0000   0.0000 
 'International Tables Vol C Tables 4.2.6.8 and 6.1.1.4' 
 'B'  'B'   0.0013   0.0007 
 'International Tables Vol C Tables 4.2.6.8 and 6.1.1.4' 
 'N'  'N'   0.0061   0.0033 
 'International Tables Vol C Tables 4.2.6.8 and 6.1.1.4' 
 'F'  'F'   0.0171   0.0103 
 'International Tables Vol C Tables 4.2.6.8 and 6.1.1.4' 
 'Cl'  'Cl'   0.1484   0.1585 
 'International Tables Vol C Tables 4.2.6.8 and 6.1.1.4' 
 'Co'  'Co'   0.3494   0.9721 
 'International Tables Vol C Tables 4.2.6.8 and 6.1.1.4' 
 
_symmetry_cell_setting            'monoclinic' 
_symmetry_space_group_name_H-M    'P2(1)/n' 
 
loop_ 
 _symmetry_equiv_pos_as_xyz 
 'x, y, z' 
 '-x+1/2, y+1/2, -z+1/2' 
 '-x, -y, -z' 
 'x-1/2, -y-1/2, z-1/2' 
 
_cell_length_a                    11.3249(7) 
_cell_length_b                    20.759(1) 
_cell_length_c                    19.422(1) 
_cell_angle_alpha                 90.00 
_cell_angle_beta                  93.061(1) 
_cell_angle_gamma                 90.00 
_cell_volume                      4559.5(4) 
_cell_formula_units_Z             4 
_cell_measurement_temperature     100(2) 
_cell_measurement_reflns_used     4221
_cell_measurement_theta_min       4.52
_cell_measurement_theta_max       55.94 
 
_exptl_crystal_description        plates 
_exptl_crystal_colour             'dark green' 
_exptl_crystal_size_max           0.35 
_exptl_crystal_size_mid           0.27 
_exptl_crystal_size_min           0.21 
_exptl_crystal_density_meas       'not measured' 
_exptl_crystal_density_diffrn     1.665 
_exptl_crystal_density_method     ? 
_exptl_crystal_F_000              2300 
_exptl_absorpt_coefficient_mu     1.436 
_exptl_absorpt_correction_type    'multi-scans' 
_exptl_absorpt_correction_T_min   0.512 
_exptl_absorpt_correction_T_max   0.657 
 
_exptl_special_details 
; 
 The dichloromethane molecules are disordered 
; 
 
_diffrn_ambient_temperature       113(2) 
_diffrn_radiation_wavelength      0.71073 
_diffrn_radiation_type            MoK\a 
_diffrn_radiation_source          'fine-focus sealed tube' 
_diffrn_radiation_monochromator   graphite 
_diffrn_measurement_device        'SMART CCD 1000' 
_diffrn_measurement_method        'Omega scans' 
_diffrn_standards_number          ? 
_diffrn_standards_interval_count  ? 
_diffrn_standards_interval_time   ? 
_diffrn_standards_decay_%         ? 
_diffrn_reflns_number             25447 
_diffrn_reflns_av_R_equivalents   0.0325 
_diffrn_reflns_av_sigmaI/netI     0.0400 
_diffrn_reflns_limit_h_min        -14 
_diffrn_reflns_limit_h_max        15 
_diffrn_reflns_limit_k_min        -18 
_diffrn_reflns_limit_k_max        27 
_diffrn_reflns_limit_l_min        -26 
_diffrn_reflns_limit_l_max        25 
_diffrn_reflns_theta_min          1.44 
_diffrn_reflns_theta_max          26.00 
_reflns_number_total              8940 
_reflns_number_observed           6286 
_reflns_observed_criterion        >2sigma(I) 

_computing_data_collection        MADNES 
_computing_cell_refinement        MADNES 
_computing_data_reduction         PROCOR 
_computing_structure_solution     'SHELXS-86 (Sheldrick, 1990)' 
_computing_structure_refinement   'SHELXL-93 (Sheldrick, 1993)' 
_computing_molecular_graphics     'XP (Siemens, 1990)' 
_computing_publication_material   'SHELXL-93 (Sheldrick, 1993)' 
 
 
_refine_special_details 
; 
 Refinement on F^2^ for ALL reflections except for 4 with very negative F^2^ 
 or flagged by the user for potential systematic errors.  Weighted R-factors 
 wR and all goodnesses of fit S are based on F^2^, conventional R-factors R 
 are based on F, with F set to zero for negative F^2^. The observed criterion 
 of F^2^ > 2sigma(F^2^) is used only for calculating -R-factor-obs etc. and is 
 not relevant to the choice of reflections for refinement.  R-factors based 
 on F^2^ are statistically about twice as large as those based on F, and R- 
 factors based on ALL data will be even larger. 
; 
 
_refine_ls_structure_factor_coef  Fsqd  
_refine_ls_matrix_type            full 
_refine_ls_weighting_scheme 
 'calc w=1/[\s^2^(Fo^2^)+(0.0460P)^2^+17.0000P] where P=(Fo^2^+2Fc^2^)/3' 
_atom_sites_solution_primary      direct 
_atom_sites_solution_secondary    difmap 
_atom_sites_solution_hydrogens    geom 
_refine_ls_hydrogen_treatment     nonref 
_refine_ls_extinction_method      none 
_refine_ls_extinction_coef        ? 
_refine_ls_number_reflns          8936 
_refine_ls_number_parameters      601 
_refine_ls_number_restraints      0 
_refine_ls_R_factor_all           0.0828 
_refine_ls_R_factor_obs           0.0609 
_refine_ls_wR_factor_all          0.1484 
_refine_ls_wR_factor_obs          0.1337 
_refine_ls_goodness_of_fit_all    1.107 
_refine_ls_goodness_of_fit_obs    1.248 
_refine_ls_restrained_S_all       1.145 
_refine_ls_restrained_S_obs       1.248 
_refine_ls_shift/esd_max          -0.027 
_refine_ls_shift/esd_mean         0.001 
 
loop_ 
 _atom_site_label 
 _atom_site_type_symbol 
 _atom_site_fract_x 
 _atom_site_fract_y 
 _atom_site_fract_z 
 _atom_site_U_iso_or_equiv 
 _atom_site_thermal_displace_type 
 _atom_site_occupancy 
 _atom_site_calc_flag 
 _atom_site_refinement_flags 
 _atom_site_disorder_group 
Co1 Co 0.79734(5) 0.19650(3) 0.14013(3) 0.02006(15) Uani 1 d . . 
Co2 Co 0.82083(5) 0.24788(3) 0.24587(3) 0.01933(14) Uani 1 d . . 
Co3 Co 0.84613(5) 0.29840(3) 0.35271(3) 0.02002(15) Uani 1 d . . 
Cl1 Cl 0.77392(10) 0.14367(5) 0.03327(5) 0.0255(2) Uani 1 d . . 
Cl2 Cl 0.87278(9) 0.34906(5) 0.46212(5) 0.0252(2) Uani 1 d . . 
N1 N 0.9596(3) 0.2272(2) 0.1264(2) 0.0237(8) Uani 1 d . . 
N2 N 0.9299(3) 0.3042(2) 0.2094(2) 0.0212(8) Uani 1 d . . 
N3 N 0.8946(3) 0.3737(2) 0.2991(2) 0.0241(8) Uani 1 d . . 
N4 N 0.6406(3) 0.1722(2) 0.1714(2) 0.0221(8) Uani 1 d . . 
N5 N 0.7130(3) 0.1910(2) 0.2829(2) 0.0207(8) Uani 1 d . . 
N6 N 0.7992(3) 0.2136(2) 0.3904(2) 0.0230(8) Uani 1 d . . 
N7 N 0.8672(3) 0.1207(2) 0.1882(2) 0.0234(8) Uani 1 d . . 
N8 N 0.9430(3) 0.1912(2) 0.2715(2) 0.0205(7) Uani 1 d . . 
N9 N 1.0101(3) 0.2667(2) 0.3512(2) 0.0232(8) Uani 1 d . . 
N10 N 0.7316(3) 0.2799(2) 0.1068(2) 0.0251(8) Uani 1 d . . 
N11 N 0.6978(3) 0.3047(2) 0.2199(2) 0.0207(8) Uani 1 d . . 
N12 N 0.6786(3) 0.3239(2) 0.3359(2) 0.0233(8) Uani 1 d . . 
C1 C 1.0332(4) 0.1940(2) 0.0866(2) 0.0278(10) Uani 1 d . . 
H1A H 1.0036(4) 0.1569(2) 0.0628(2) 0.033 Uiso 1 calc R . 
C2 C 1.1489(4) 0.2117(2) 0.0790(2) 0.0304(11) Uani 1 d . . 
H2A H 1.1980(4) 0.1873(2) 0.0506(2) 0.037 Uiso 1 calc R . 
C3 C 1.1922(4) 0.2659(2) 0.1138(2) 0.0310(11) Uani 1 d . . 
H3A H 1.2715(4) 0.2793(2) 0.1089(2) 0.037 Uiso 1 calc R . 
C4 C 1.1209(4) 0.2998(2) 0.1552(2) 0.0285(10) Uani 1 d . . 
H4A H 1.1503(4) 0.3368(2) 0.1792(2) 0.034 Uiso 1 calc R . 
C5 C 1.0039(4) 0.2796(2) 0.1619(2) 0.0239(9) Uani 1 d . . 
C6 C 0.9376(4) 0.3660(2) 0.2356(2) 0.0224(9) Uani 1 d . . 
C7 C 0.9794(4) 0.4186(2) 0.1989(2) 0.0286(10) Uani 1 d . . 
H7A H 1.0092(4) 0.4124(2) 0.1546(2) 0.034 Uiso 1 calc R . 
C8 C 0.9771(4) 0.4794(2) 0.2274(3) 0.0319(11) Uani 1 d . . 
H8A H 1.0081(4) 0.5151(2) 0.2037(3) 0.038 Uiso 1 calc R . 
C9 C 0.9290(4) 0.4877(2) 0.2908(3) 0.0311(11) Uani 1 d . . 
H9A H 0.9243(4) 0.5294(2) 0.3108(3) 0.037 Uiso 1 calc R . 
C10 C 0.8880(4) 0.4343(2) 0.3245(2) 0.0274(10) Uani 1 d . . 
H10A H 0.8535(4) 0.4404(2) 0.3675(2) 0.033 Uiso 1 calc R . 
C11 C 0.5476(4) 0.1603(2) 0.1255(2) 0.0260(10) Uani 1 d . . 
H11A H 0.5587(4) 0.1653(2) 0.0777(2) 0.031 Uiso 1 calc R . 
C12 C 0.4389(4) 0.1415(2) 0.1459(2) 0.0283(10) Uani 1 d . . 
H12A H 0.3766(4) 0.1327(2) 0.1125(2) 0.034 Uiso 1 calc R . 
C13 C 0.4205(4) 0.1353(2) 0.2159(2) 0.0277(10) Uani 1 d . . 
H13A H 0.3459(4) 0.1219(2) 0.2307(2) 0.033 Uiso 1 calc R . 
C14 C 0.5121(4) 0.1490(2) 0.2633(2) 0.0253(10) Uani 1 d . . 
H14A H 0.5014(4) 0.1449(2) 0.3113(2) 0.030 Uiso 1 calc R . 
C15 C 0.6211(4) 0.1689(2) 0.2397(2) 0.0226(9) Uani 1 d . . 
C16 C 0.7365(4) 0.1713(2) 0.3497(2) 0.0225(9) Uani 1 d . . 
C17 C 0.7115(4) 0.1090(2) 0.3736(2) 0.0270(10) Uani 1 d . . 
H17A H 0.6680(4) 0.0796(2) 0.3447(2) 0.032 Uiso 1 calc R . 
C18 C 0.7504(4) 0.0912(2) 0.4389(2) 0.0320(11) Uani 1 d . . 
H18A H 0.7326(4) 0.0496(2) 0.4559(2) 0.038 Uiso 1 calc R . 
C19 C 0.8161(4) 0.1345(2) 0.4803(2) 0.0335(11) Uani 1 d . . 
H19A H 0.8446(4) 0.1227(2) 0.5254(2) 0.040 Uiso 1 calc R . 
C20 C 0.8387(4) 0.1945(2) 0.4543(2) 0.0274(10) Uani 1 d . . 
H20A H 0.8840(4) 0.2239(2) 0.4823(2) 0.033 Uiso 1 calc R . 
C21 C 0.7346(4) 0.2969(2) 0.0398(2) 0.0277(10) Uani 1 d . . 
H21A H 0.7709(4) 0.2683(2) 0.0091(2) 0.033 Uiso 1 calc R . 
C22 C 0.6876(5) 0.3534(2) 0.0140(2) 0.0339(11) Uani 1 d . . 
H22A H 0.6895(5) 0.3631(2) -0.0337(2) 0.041 Uiso 1 calc R . 
C23 C 0.6367(4) 0.3964(2) 0.0595(2) 0.0320(11) Uani 1 d . . 
H23A H 0.6025(4) 0.4356(2) 0.0429(2) 0.038 Uiso 1 calc R . 
C24 C 0.6369(4) 0.3812(2) 0.1283(2) 0.0278(10) Uani 1 d . . 
H24A H 0.6053(4) 0.4106(2) 0.1599(2) 0.033 Uiso 1 calc R . 
C25 C 0.6839(4) 0.3220(2) 0.1519(2) 0.0238(9) Uani 1 d . . 
C26 C 0.6268(4) 0.3260(2) 0.2712(2) 0.0222(9) Uani 1 d . . 
C27 C 0.5089(4) 0.3435(2) 0.2589(2) 0.0243(9) Uani 1 d . . 
H27A H 0.4745(4) 0.3439(2) 0.2132(2) 0.029 Uiso 1 calc R . 
C28 C 0.4423(4) 0.3602(2) 0.3136(2) 0.0276(10) Uani 1 d . . 
H28A H 0.3622(4) 0.3730(2) 0.3058(2) 0.033 Uiso 1 calc R . 
C29 C 0.4937(4) 0.3581(2) 0.3803(2) 0.0281(10) Uani 1 d . . 
H29A H 0.4496(4) 0.3696(2) 0.4187(2) 0.034 Uiso 1 calc R . 
C30 C 0.6100(4) 0.3391(2) 0.3892(2) 0.0274(10) Uani 1 d . . 
H30A H 0.6442(4) 0.3364(2) 0.4348(2) 0.033 Uiso 1 calc R . 
C31 C 0.8498(4) 0.0599(2) 0.1647(2) 0.0255(10) Uani 1 d . . 
H31A H 0.7974(4) 0.0535(2) 0.1254(2) 0.031 Uiso 1 calc R . 
C32 C 0.9043(4) 0.0071(2) 0.1948(2) 0.0314(11) Uani 1 d . . 
H32A H 0.8908(4) -0.0348(2) 0.1762(2) 0.038 Uiso 1 calc R . 
C33 C 0.9794(4) 0.0160(2) 0.2528(2) 0.0302(11) Uani 1 d . . 
H33A H 1.0200(4) -0.0197(2) 0.2736(2) 0.036 Uiso 1 calc R . 
C34 C 0.9946(4) 0.0764(2) 0.2800(2) 0.0273(10) Uani 1 d . . 
H34A H 1.0427(4) 0.0827(2) 0.3210(2) 0.033 Uiso 1 calc R . 
C35 C 0.9383(4) 0.1289(2) 0.2465(2) 0.0227(9) Uani 1 d . . 
C36 C 1.0366(4) 0.2151(2) 0.3114(2) 0.0248(9) Uani 1 d . . 
C37 C 1.1537(4) 0.1940(2) 0.3071(2) 0.0287(10) Uani 1 d . . 
H37A H 1.1708(4) 0.1575(2) 0.2799(2) 0.034 Uiso 1 calc R . 
C38 C 1.2431(4) 0.2263(2) 0.3423(2) 0.0292(10) Uani 1 d . . 
H38A H 1.3228(4) 0.2126(2) 0.3396(2) 0.035 Uiso 1 calc R . 
C39 C 1.2164(4) 0.2791(2) 0.3821(2) 0.0272(10) Uani 1 d . . 
H39A H 1.2774(4) 0.3021(2) 0.4069(2) 0.033 Uiso 1 calc R . 
C40 C 1.1004(4) 0.2980(2) 0.3851(2) 0.0254(10) Uani 1 d . . 
H40A H 1.0829(4) 0.3345(2) 0.4122(2) 0.030 Uiso 1 calc R . 
B1 B 0.7602(6) 0.0127(3) 0.6265(3) 0.045(2) Uani 1 d . . 
F1 F 0.7938(4) 0.0676(2) 0.6631(2) 0.0766(12) Uani 1 d . . 
F2 F 0.8516(3) -0.0050(2) 0.5860(2) 0.0597(10) Uani 1 d . . 
F3 F 0.7362(3) -0.0360(2) 0.6710(2) 0.0700(11) Uani 1 d . . 
F4 F 0.6603(3) 0.0278(2) 0.5848(2) 0.0628(10) Uani 1 d . . 
Cl6 Cl 0.7655(4) 0.5071(2) 0.6428(2) 0.0520(7) Uiso 0.50 d P . 
Cl7 Cl 0.7093(8) 0.4868(4) 0.6267(5) 0.0520(7) Uiso 0.20 d P . 
Cl8 Cl 0.5980(6) 0.4737(3) 0.5171(4) 0.0520(7) Uiso 0.30 d P . 
Cl9 Cl 0.7401(9) 0.4939(5) 0.6491(6) 0.0520(7) Uiso 0.20 d P . 
Cl10 Cl 0.7998(16) 0.5248(9) 0.6347(9) 0.0520(7) Uiso 0.10 d P . 
Cl11 Cl 0.6392(14) 0.4690(7) 0.5360(8) 0.030(3) Uiso 0.10 d P . 
C2S C 0.7696(7) 0.4954(4) 0.5499(4) 0.069(2) Uiso 1 d . 3 
Cl12 Cl 0.9129(10) 0.5201(5) 0.5373(6) 0.083(3) Uiso 0.20 d P 3 
Cl13 Cl 0.6477(4) 0.4719(2) 0.5109(3) 0.0408(10) Uiso 0.40 d P 3 
C1S C 0.4861 0.1435 0.5141 0.124(2) Uiso 0.50 d P . 
Cl3 Cl 0.4903(6) 0.1962(3) 0.4447(3) 0.124(2) Uiso 0.50 d P . 
Cl4 Cl 0.4673(9) 0.0674(5) 0.5012(6) 0.124(2) Uiso 0.30 d P . 
Cl5 Cl 0.4276(14) 0.0728(8) 0.4462(9) 0.124(2) Uiso 0.20 d P . 
 
loop_ 
 _atom_site_aniso_label 
 _atom_site_aniso_U_11 
 _atom_site_aniso_U_22 
 _atom_site_aniso_U_33 
 _atom_site_aniso_U_23 
 _atom_site_aniso_U_13 
 _atom_site_aniso_U_12 
Co1 0.0225(3) 0.0194(3) 0.0183(3) -0.0004(2) 0.0015(2) 0.0015(2) 
Co2 0.0203(3) 0.0189(3) 0.0188(3) -0.0002(2) 0.0014(2) 0.0006(2) 
Co3 0.0208(3) 0.0206(3) 0.0187(3) -0.0011(2) 0.0021(2) -0.0006(2) 
Cl1 0.0320(6) 0.0244(6) 0.0200(5) -0.0021(4) 0.0001(4) 0.0018(4) 
Cl2 0.0268(5) 0.0285(6) 0.0206(5) -0.0041(4) 0.0029(4) -0.0019(4) 
N1 0.027(2) 0.024(2) 0.020(2) 0.000(2) 0.0029(15) 0.002(2) 
N2 0.022(2) 0.020(2) 0.022(2) -0.0009(15) 0.0019(14) -0.0003(14) 
N3 0.023(2) 0.024(2) 0.025(2) -0.001(2) 0.001(2) -0.002(2) 
N4 0.025(2) 0.018(2) 0.023(2) -0.0002(15) 0.0011(15) 0.0015(15) 
N5 0.024(2) 0.020(2) 0.018(2) -0.0012(14) 0.0019(14) -0.0017(15) 
N6 0.023(2) 0.025(2) 0.021(2) -0.001(2) 0.0038(15) 0.000(2) 
N7 0.025(2) 0.023(2) 0.022(2) -0.001(2) 0.0026(15) 0.002(2) 
N8 0.021(2) 0.021(2) 0.020(2) -0.0012(14) 0.0011(14) 0.0014(14) 
N9 0.024(2) 0.023(2) 0.023(2) 0.001(2) 0.0027(15) -0.001(2) 
N10 0.026(2) 0.025(2) 0.024(2) 0.000(2) 0.000(2) 0.000(2) 
N11 0.023(2) 0.022(2) 0.017(2) -0.0008(14) 0.0025(14) 0.0014(15) 
N12 0.028(2) 0.021(2) 0.022(2) -0.0028(15) 0.004(2) 0.002(2) 
C1 0.030(2) 0.030(3) 0.024(2) -0.002(2) 0.001(2) 0.008(2) 
C2 0.028(2) 0.039(3) 0.025(2) -0.002(2) 0.005(2) 0.003(2) 
C3 0.026(2) 0.037(3) 0.031(3) 0.002(2) 0.006(2) 0.002(2) 
C4 0.030(2) 0.030(3) 0.025(2) 0.001(2) 0.001(2) 0.000(2) 
C5 0.026(2) 0.024(2) 0.022(2) 0.003(2) 0.003(2) 0.002(2) 
C6 0.020(2) 0.023(2) 0.024(2) -0.001(2) 0.000(2) -0.001(2) 
C7 0.029(2) 0.029(2) 0.029(2) 0.000(2) 0.006(2) -0.001(2) 
C8 0.036(3) 0.024(2) 0.036(3) 0.004(2) 0.005(2) -0.002(2) 
C9 0.034(3) 0.020(2) 0.040(3) -0.005(2) 0.006(2) -0.001(2) 
C10 0.028(2) 0.025(2) 0.030(2) -0.004(2) 0.002(2) 0.002(2) 
C11 0.032(2) 0.021(2) 0.024(2) -0.002(2) 0.000(2) 0.004(2) 
C12 0.029(2) 0.028(2) 0.027(2) -0.006(2) -0.004(2) 0.003(2) 
C13 0.026(2) 0.024(2) 0.033(3) -0.002(2) 0.001(2) 0.002(2) 
C14 0.028(2) 0.022(2) 0.027(2) -0.001(2) 0.003(2) 0.002(2) 
C15 0.027(2) 0.016(2) 0.025(2) -0.001(2) 0.001(2) 0.003(2) 
C16 0.023(2) 0.026(2) 0.019(2) 0.000(2) 0.004(2) 0.001(2) 
C17 0.031(2) 0.022(2) 0.028(2) 0.000(2) 0.002(2) -0.001(2) 
C18 0.038(3) 0.028(3) 0.030(3) 0.006(2) 0.001(2) -0.001(2) 
C19 0.042(3) 0.034(3) 0.024(2) 0.003(2) -0.001(2) 0.007(2) 
C20 0.030(2) 0.029(2) 0.023(2) 0.001(2) -0.001(2) 0.001(2) 
C21 0.036(3) 0.027(2) 0.020(2) 0.001(2) 0.000(2) 0.002(2) 
C22 0.045(3) 0.033(3) 0.023(2) 0.005(2) 0.000(2) 0.002(2) 
C23 0.038(3) 0.028(3) 0.031(3) 0.005(2) -0.001(2) 0.003(2) 
C24 0.031(2) 0.023(2) 0.029(3) 0.001(2) 0.001(2) 0.004(2) 
C25 0.024(2) 0.024(2) 0.023(2) 0.001(2) 0.002(2) -0.004(2) 
C26 0.025(2) 0.016(2) 0.026(2) 0.001(2) 0.002(2) -0.002(2) 
C27 0.025(2) 0.021(2) 0.028(2) 0.000(2) 0.001(2) -0.002(2) 
C28 0.023(2) 0.022(2) 0.038(3) 0.001(2) 0.004(2) 0.002(2) 
C29 0.028(2) 0.027(2) 0.030(3) -0.003(2) 0.010(2) -0.001(2) 
C30 0.033(3) 0.026(2) 0.023(2) -0.001(2) 0.005(2) 0.000(2) 
C31 0.024(2) 0.025(2) 0.028(2) -0.003(2) 0.003(2) -0.001(2) 
C32 0.035(3) 0.024(2) 0.034(3) -0.001(2) 0.002(2) 0.000(2) 
C33 0.031(3) 0.026(2) 0.034(3) 0.005(2) 0.003(2) 0.004(2) 
C34 0.028(2) 0.029(2) 0.025(2) 0.003(2) 0.000(2) 0.002(2) 
C35 0.022(2) 0.023(2) 0.023(2) 0.001(2) 0.003(2) 0.003(2) 
C36 0.030(2) 0.024(2) 0.020(2) 0.002(2) 0.004(2) 0.002(2) 
C37 0.028(2) 0.031(3) 0.028(2) -0.003(2) 0.004(2) 0.003(2) 
C38 0.021(2) 0.036(3) 0.030(3) -0.001(2) 0.002(2) 0.001(2) 
C39 0.026(2) 0.032(3) 0.023(2) 0.001(2) 0.000(2) -0.004(2) 
C40 0.029(2) 0.028(2) 0.019(2) -0.001(2) 0.002(2) -0.002(2) 
B1 0.046(4) 0.050(4) 0.041(4) 0.005(3) 0.004(3) 0.016(3) 
F1 0.081(3) 0.070(3) 0.077(3) -0.011(2) -0.012(2) 0.031(2) 
F2 0.056(2) 0.069(2) 0.056(2) 0.009(2) 0.017(2) 0.022(2) 
F3 0.057(2) 0.089(3) 0.065(2) 0.037(2) 0.012(2) 0.022(2) 
F4 0.054(2) 0.090(3) 0.044(2) 0.014(2) 0.000(2) 0.025(2) 
 
_geom_special_details 
; 
 All esds (except the esd in the dihedral angle between two l.s. planes) 
 are estimated using the full covariance matrix.  The cell esds are taken 
 into account individually in the estimation of esds in distances, angles 
 and torsion angles; correlations between esds in cell parameters are only 
 used when they are defined by crystal symmetry.  An approximate (isotropic) 
 treatment of cell esds is used for estimating esds involving l.s. planes. 
; 
 
loop_ 
 _geom_bond_atom_site_label_1 
 _geom_bond_atom_site_label_2 
 _geom_bond_distance 
 _geom_bond_site_symmetry_2 
 _geom_bond_publ_flag 
Co1 N7 1.973(4) . ? 
Co1 N4 1.972(4) . ? 
Co1 N1 1.976(4) . ? 
Co1 N10 1.980(4) . ? 
Co1 Co2 2.3168(8) . ? 
Co1 Cl1 2.3499(12) . ? 
Co2 N8 1.864(3) . ? 
Co2 N5 1.870(3) . ? 
Co2 N2 1.868(4) . ? 
Co2 N11 1.874(3) . ? 
Co2 Co3 2.3289(8) . ? 
Co3 N9 1.972(4) . ? 
Co3 N3 1.974(4) . ? 
Co3 N12 1.980(4) . ? 
Co3 N6 1.990(4) . ? 
Co3 Cl2 2.3758(12) . ? 
N1 C1 1.355(6) . ? 
N1 C5 1.368(6) . ? 
N2 C6 1.380(5) . ? 
N2 C5 1.378(5) . ? 
N3 C10 1.355(6) . ? 
N3 C6 1.358(6) . ? 
N4 C15 1.359(6) . ? 
N4 C11 1.365(6) . ? 
N5 C16 1.374(5) . ? 
N5 C15 1.380(5) . ? 
N6 C20 1.355(6) . ? 
N6 C16 1.356(6) . ? 
N7 C31 1.352(6) . ? 
N7 C35 1.365(5) . ? 
N8 C36 1.372(6) . ? 
N8 C35 1.380(5) . ? 
N9 C40 1.353(6) . ? 
N9 C36 1.363(6) . ? 
N10 C21 1.349(6) . ? 
N10 C25 1.369(6) . ? 
N11 C25 1.370(5) . ? 
N11 C26 1.384(5) . ? 
N12 C26 1.359(6) . ? 
N12 C30 1.364(6) . ? 
C1 C2 1.376(6) . ? 
C2 C3 1.388(7) . ? 
C3 C4 1.364(6) . ? 
C4 C5 1.403(6) . ? 
C6 C7 1.400(6) . ? 
C7 C8 1.378(7) . ? 
C8 C9 1.385(7) . ? 
C9 C10 1.379(7) . ? 
C11 C12 1.370(6) . ? 
C12 C13 1.392(7) . ? 
C13 C14 1.379(6) . ? 
C14 C15 1.402(6) . ? 
C16 C17 1.408(6) . ? 
C17 C18 1.370(7) . ? 
C18 C19 1.393(7) . ? 
C19 C20 1.374(7) . ? 
C21 C22 1.372(6) . ? 
C22 C23 1.402(7) . ? 
C23 C24 1.372(7) . ? 
C24 C25 1.407(6) . ? 
C26 C27 1.393(6) . ? 
C27 C28 1.379(6) . ? 
C28 C29 1.392(7) . ? 
C29 C30 1.377(6) . ? 
C31 C32 1.374(6) . ? 
C32 C33 1.388(7) . ? 
C33 C34 1.368(7) . ? 
C34 C35 1.406(6) . ? 
C36 C37 1.404(6) . ? 
C37 C38 1.367(6) . ? 
C38 C39 1.385(7) . ? 
C39 C40 1.375(6) . ? 
B1 F3 1.368(8) . ? 
B1 F2 1.382(7) . ? 
B1 F1 1.387(8) . ? 
B1 F4 1.392(7) . ? 
Cl6 C2S 1.825(9) . ? 
Cl7 C2S 1.684(12) . ? 
Cl8 C2S 2.062(10) . ? 
Cl9 C2S 1.974(13) . ? 
Cl10 C2S 1.77(2) . ? 
Cl11 C2S 1.58(2) . ? 
C2S Cl13 1.614(9) . ? 
C2S Cl12 1.731(13) . ? 
C1S Cl4 1.612(11) . ? 
C1S Cl3 1.737(6) . ? 
C1S Cl5 2.06(2) . ? 
 
loop_ 
 _geom_angle_atom_site_label_1 
 _geom_angle_atom_site_label_2 
 _geom_angle_atom_site_label_3 
 _geom_angle 
 _geom_angle_site_symmetry_1 
 _geom_angle_site_symmetry_3 
 _geom_angle_publ_flag 
N7 Co1 N4 89.71(15) . . ? 
N7 Co1 N1 88.20(15) . . ? 
N4 Co1 N1 169.32(15) . . ? 
N7 Co1 N10 170.5(2) . . ? 
N4 Co1 N10 89.75(15) . . ? 
N1 Co1 N10 90.6(2) . . ? 
N7 Co1 Co2 85.65(11) . . ? 
N4 Co1 Co2 84.70(11) . . ? 
N1 Co1 Co2 84.69(11) . . ? 
N10 Co1 Co2 84.89(11) . . ? 
N7 Co1 Cl1 93.94(11) . . ? 
N4 Co1 Cl1 95.25(11) . . ? 
N1 Co1 Cl1 95.35(11) . . ? 
N10 Co1 Cl1 95.52(11) . . ? 
Co2 Co1 Cl1 179.58(4) . . ? 
N8 Co2 N5 89.4(2) . . ? 
N8 Co2 N2 90.0(2) . . ? 
N5 Co2 N2 179.4(2) . . ? 
N8 Co2 N11 179.82(13) . . ? 
N5 Co2 N11 90.5(2) . . ? 
N2 Co2 N11 90.1(2) . . ? 
N8 Co2 Co1 89.68(11) . . ? 
N5 Co2 Co1 90.20(11) . . ? 
N2 Co2 Co1 89.94(11) . . ? 
N11 Co2 Co1 90.17(11) . . ? 
N8 Co2 Co3 89.55(11) . . ? 
N5 Co2 Co3 89.65(11) . . ? 
N2 Co2 Co3 90.21(11) . . ? 
N11 Co2 Co3 90.59(11) . . ? 
Co1 Co2 Co3 179.22(3) . . ? 
N9 Co3 N3 88.16(15) . . ? 
N9 Co3 N12 169.00(15) . . ? 
N3 Co3 N12 89.55(15) . . ? 
N9 Co3 N6 88.89(15) . . ? 
N3 Co3 N6 169.37(15) . . ? 
N12 Co3 N6 91.42(15) . . ? 
N9 Co3 Co2 84.69(11) . . ? 
N3 Co3 Co2 84.89(11) . . ? 
N12 Co3 Co2 84.40(10) . . ? 
N6 Co3 Co2 84.66(10) . . ? 
N9 Co3 Cl2 94.96(11) . . ? 
N3 Co3 Cl2 95.50(11) . . ? 
N12 Co3 Cl2 95.96(11) . . ? 
N6 Co3 Cl2 94.94(11) . . ? 
Co2 Co3 Cl2 179.47(4) . . ? 
C1 N1 C5 118.0(4) . . ? 
C1 N1 Co1 121.2(3) . . ? 
C5 N1 Co1 120.5(3) . . ? 
C6 N2 C5 124.3(4) . . ? 
C6 N2 Co2 118.1(3) . . ? 
C5 N2 Co2 117.3(3) . . ? 
C10 N3 C6 118.0(4) . . ? 
C10 N3 Co3 121.4(3) . . ? 
C6 N3 Co3 120.5(3) . . ? 
C15 N4 C11 117.9(4) . . ? 
C15 N4 Co1 120.6(3) . . ? 
C11 N4 Co1 121.4(3) . . ? 
C16 N5 C15 125.3(4) . . ? 
C16 N5 Co2 117.0(3) . . ? 
C15 N5 Co2 117.6(3) . . ? 
C20 N6 C16 118.7(4) . . ? 
C20 N6 Co3 120.9(3) . . ? 
C16 N6 Co3 120.0(3) . . ? 
C31 N7 C35 117.8(4) . . ? 
C31 N7 Co1 122.5(3) . . ? 
C35 N7 Co1 119.7(3) . . ? 
C36 N8 C35 123.5(4) . . ? 
C36 N8 Co2 117.5(3) . . ? 
C35 N8 Co2 118.9(3) . . ? 
C40 N9 C36 118.1(4) . . ? 
C40 N9 Co3 121.3(3) . . ? 
C36 N9 Co3 120.4(3) . . ? 
C21 N10 C25 118.8(4) . . ? 
C21 N10 Co1 121.0(3) . . ? 
C25 N10 Co1 120.2(3) . . ? 
C25 N11 C26 124.7(4) . . ? 
C25 N11 Co2 118.0(3) . . ? 
C26 N11 Co2 117.4(3) . . ? 
C26 N12 C30 117.4(4) . . ? 
C26 N12 Co3 121.5(3) . . ? 
C30 N12 Co3 121.1(3) . . ? 
N1 C1 C2 123.0(4) . . ? 
C1 C2 C3 118.6(4) . . ? 
C4 C3 C2 120.0(4) . . ? 
C3 C4 C5 119.5(4) . . ? 
N1 C5 N2 114.3(4) . . ? 
N1 C5 C4 121.0(4) . . ? 
N2 C5 C4 124.2(4) . . ? 
N3 C6 N2 115.3(4) . . ? 
N3 C6 C7 121.1(4) . . ? 
N2 C6 C7 123.5(4) . . ? 
C8 C7 C6 119.7(4) . . ? 
C7 C8 C9 119.2(4) . . ? 
C10 C9 C8 118.6(4) . . ? 
N3 C10 C9 123.2(4) . . ? 
N4 C11 C12 122.5(4) . . ? 
C11 C12 C13 119.4(4) . . ? 
C14 C13 C12 119.2(4) . . ? 
C13 C14 C15 119.0(4) . . ? 
N4 C15 N5 114.8(4) . . ? 
N4 C15 C14 121.7(4) . . ? 
N5 C15 C14 123.3(4) . . ? 
N6 C16 N5 115.3(4) . . ? 
N6 C16 C17 120.7(4) . . ? 
N5 C16 C17 123.5(4) . . ? 
C18 C17 C16 119.5(4) . . ? 
C17 C18 C19 119.7(4) . . ? 
C20 C19 C18 118.5(4) . . ? 
N6 C20 C19 122.8(4) . . ? 
N10 C21 C22 123.1(4) . . ? 
C21 C22 C23 118.7(4) . . ? 
C24 C23 C22 119.2(4) . . ? 
C23 C24 C25 120.0(4) . . ? 
N11 C25 N10 115.0(4) . . ? 
N11 C25 C24 124.4(4) . . ? 
N10 C25 C24 120.2(4) . . ? 
N12 C26 N11 114.6(4) . . ? 
N12 C26 C27 121.9(4) . . ? 
N11 C26 C27 123.3(4) . . ? 
C28 C27 C26 119.5(4) . . ? 
C27 C28 C29 119.4(4) . . ? 
C30 C29 C28 118.4(4) . . ? 
N12 C30 C29 123.4(4) . . ? 
N7 C31 C32 123.2(4) . . ? 
C31 C32 C33 118.8(4) . . ? 
C34 C33 C32 119.6(4) . . ? 
C33 C34 C35 119.2(4) . . ? 
N7 C35 N8 114.8(4) . . ? 
N7 C35 C34 121.3(4) . . ? 
N8 C35 C34 123.7(4) . . ? 
N9 C36 N8 114.7(4) . . ? 
N9 C36 C37 121.1(4) . . ? 
N8 C36 C37 123.9(4) . . ? 
C38 C37 C36 119.7(4) . . ? 
C37 C38 C39 119.3(4) . . ? 
C40 C39 C38 119.2(4) . . ? 
N9 C40 C39 122.7(4) . . ? 
F3 B1 F2 110.1(5) . . ? 
F3 B1 F1 110.0(5) . . ? 
F2 B1 F1 108.5(6) . . ? 
F3 B1 F4 110.6(6) . . ? 
F2 B1 F4 109.9(5) . . ? 
F1 B1 F4 107.7(5) . . ? 
Cl10 Cl6 Cl7 140.2(25) . . ? 
Cl10 Cl6 C2S 75.8(21) . . ? 
Cl7 Cl6 C2S 67.1(8) . . ? 
Cl9 Cl7 Cl6 29.0(13) . . ? 
Cl9 Cl7 Cl10 45.1(16) . . ? 
Cl6 Cl7 Cl10 16.1(10) . . ? 
Cl9 Cl7 C2S 113.2(18) . . ? 
Cl6 Cl7 C2S 86.5(8) . . ? 
Cl10 Cl7 C2S 71.7(9) . . ? 
Cl9 Cl7 Cl11 164.7(19) . . ? 
Cl6 Cl7 Cl11 136.6(11) . . ? 
Cl10 Cl7 Cl11 120.6(11) . . ? 
C2S Cl7 Cl11 51.5(6) . . ? 
Cl9 Cl7 Cl13 156.7(18) . . ? 
Cl6 Cl7 Cl13 128.7(9) . . ? 
Cl10 Cl7 Cl13 112.8(9) . . ? 
C2S Cl7 Cl13 43.6(3) . . ? 
Cl11 Cl7 Cl13 8.0(5) . . ? 
Cl9 Cl7 Cl8 167.9(18) . . ? 
Cl6 Cl7 Cl8 139.0(9) . . ? 
Cl10 Cl7 Cl8 122.8(10) . . ? 
C2S Cl7 Cl8 56.8(4) . . ? 
Cl11 Cl7 Cl8 8.0(5) . . ? 
Cl13 Cl7 Cl8 13.9(2) . . ? 
Cl13 Cl8 Cl11 51.2(15) . . ? 
Cl13 Cl8 C2S 34.2(8) . . ? 
Cl11 Cl8 C2S 30.3(17) . . ? 
Cl13 Cl8 Cl7 74.2(10) . . ? 
Cl11 Cl8 Cl7 27.4(18) . . ? 
C2S Cl8 Cl7 43.1(3) . . ? 
Cl7 Cl9 Cl10 111.0(21) . . ? 
Cl7 Cl9 C2S 51.6(15) . . ? 
Cl10 Cl9 C2S 63.7(11) . . ? 
Cl7 Cl9 Cl11 11.9(15) . . ? 
Cl10 Cl9 Cl11 100.0(12) . . ? 
C2S Cl9 Cl11 39.7(5) . . ? 
Cl6 Cl10 Cl9 0.3(13) . . ? 
Cl6 Cl10 Cl7 23.6(16) . . ? 
Cl9 Cl10 Cl7 23.9(8) . . ? 
Cl6 Cl10 C2S 86.2(22) . . ? 
Cl9 Cl10 C2S 86.5(12) . . ? 
Cl7 Cl10 C2S 64.3(9) . . ? 
Cl6 Cl10 Cl12 127.9(25) . . ? 
Cl9 Cl10 Cl12 128.1(14) . . ? 
Cl7 Cl10 Cl12 109.9(11) . . ? 
C2S Cl10 Cl12 47.3(6) . . ? 
Cl13 Cl11 Cl8 64.2(19) . . ? 
Cl13 Cl11 C2S 84.2(22) . . ? 
Cl8 Cl11 C2S 138.9(22) . . ? 
Cl13 Cl11 Cl7 140.1(24) . . ? 
Cl8 Cl11 Cl7 144.6(23) . . ? 
C2S Cl11 Cl7 56.2(6) . . ? 
Cl13 Cl11 Cl9 136.7(23) . . ? 
Cl8 Cl11 Cl9 146.6(22) . . ? 
C2S Cl11 Cl9 52.8(6) . . ? 
Cl7 Cl11 Cl9 3.5(4) . . ? 
Cl13 C2S Cl7 90.3(5) . . ? 
Cl11 C2S Cl12 161.9(9) . . ? 
Cl11 C2S Cl10 114.1(9) . . ? 
Cl13 C2S Cl10 131.1(8) . . ? 
Cl12 C2S Cl10 83.8(8) . . ? 
Cl11 C2S Cl6 98.1(7) . . ? 
Cl13 C2S Cl6 116.0(5) . . ? 
Cl12 C2S Cl6 100.0(5) . . ? 
Cl13 C2S Cl9 105.6(5) . . ? 
Cl12 C2S Cl9 110.5(6) . . ? 
Cl10 C2S Cl8 119.6(7) . . ? 
Cl6 C2S Cl8 105.1(4) . . ? 
Cl9 C2S Cl8 95.3(5) . . ? 
Cl4 C1S Cl3 120.4(4) . . ? 
Cl3 C1S Cl5 88.5(5) . . ? 
 
_refine_diff_density_max    1.328 
_refine_diff_density_min   -1.087 
_refine_diff_density_rms    0.138 

#===END

#CIF for 2 at 213 K======Cotton, F. A. et al======== 

data_213K 
 
_audit_creation_method            SHELXL 
_chemical_name_systematic 
; 
 ? 
; 
_chemical_name_common             ? 
_chemical_formula_moiety          ? 
_chemical_formula_structural      '[Co3(dpa)4Cl2][BF4] 2CH2Cl2' 
_chemical_formula_analytical      ? 
_chemical_formula_sum             'C42 H36 B Cl6 Co3 F4 N12' 
_chemical_formula_weight          1185.13 
_chemical_melting_point           ? 
_chemical_compound_source         synthesis 
 
loop_ 
 _atom_type_symbol 
 _atom_type_description 
 _atom_type_scat_dispersion_real 
 _atom_type_scat_dispersion_imag 
 _atom_type_scat_source 
 'C'  'C'   0.0033   0.0016 
 'International Tables Vol C Tables 4.2.6.8 and 6.1.1.4' 
 'H'  'H'   0.0000   0.0000 
 'International Tables Vol C Tables 4.2.6.8 and 6.1.1.4' 
 'B'  'B'   0.0013   0.0007 
 'International Tables Vol C Tables 4.2.6.8 and 6.1.1.4' 
 'N'  'N'   0.0061   0.0033 
 'International Tables Vol C Tables 4.2.6.8 and 6.1.1.4' 
 'F'  'F'   0.0171   0.0103 
 'International Tables Vol C Tables 4.2.6.8 and 6.1.1.4' 
 'Cl'  'Cl'   0.1484   0.1585 
 'International Tables Vol C Tables 4.2.6.8 and 6.1.1.4' 
 'Co'  'Co'   0.3494   0.9721 
 'International Tables Vol C Tables 4.2.6.8 and 6.1.1.4' 
 
_symmetry_cell_setting            'monoclinic' 
_symmetry_space_group_name_H-M    'P2(1)/n' 
 
loop_ 
 _symmetry_equiv_pos_as_xyz 
 'x, y, z' 
 '-x+1/2, y+1/2, -z+1/2' 
 '-x, -y, -z' 
 'x-1/2, -y-1/2, z-1/2' 
 
_cell_length_a                    11.3999(7) 
_cell_length_b                    20.913(1) 
_cell_length_c                    19.752(1) 
_cell_angle_alpha                 90.00 
_cell_angle_beta                  92.954(3) 
_cell_angle_gamma                 90.00 
_cell_volume                      4702.7(4) 
_cell_formula_units_Z             4 
_cell_measurement_temperature     213(2) 
_cell_measurement_reflns_used     250 
_cell_measurement_theta_min       9.05
_cell_measurement_theta_max       20.9 
 
_exptl_crystal_description        plates 
_exptl_crystal_colour             brown 
_exptl_crystal_size_max           0.18 
_exptl_crystal_size_mid           0.14 
_exptl_crystal_size_min           0.02 
_exptl_crystal_density_meas       'not measured' 
_exptl_crystal_density_diffrn     1.674 
_exptl_crystal_density_method     ? 
_exptl_crystal_F_000              2384 
_exptl_absorpt_coefficient_mu     1.450 
_exptl_absorpt_correction_type    'none' 
_exptl_absorpt_correction_T_min   ? 
_exptl_absorpt_correction_T_max   ? 
 
_exptl_special_details 
; 
 The dichloromethane molecules are disordered. 
; 
 
_diffrn_ambient_temperature       213(2) 
_diffrn_radiation_wavelength      0.71073 
_diffrn_radiation_type            MoK\a 
_diffrn_radiation_source          'fine-focus sealed tube' 
_diffrn_radiation_monochromator   graphite 
_diffrn_measurement_device     'Nonius FAST area detector'
_diffrn_measurement_method     'Ellipsoid-mask fitting'
_diffrn_standards_number       'None (area detector data)'
_diffrn_standards_interval_count  ? 
_diffrn_standards_interval_time   ? 
_diffrn_standards_decay_%         ? 
_diffrn_reflns_number             20031 
_diffrn_reflns_av_R_equivalents   0.0629 
_diffrn_reflns_av_sigmaI/netI     0.0416 
_diffrn_reflns_limit_h_min        -12 
_diffrn_reflns_limit_h_max        12 
_diffrn_reflns_limit_k_min        -22 
_diffrn_reflns_limit_k_max        22 
_diffrn_reflns_limit_l_min        -20 
_diffrn_reflns_limit_l_max        21 
_diffrn_reflns_theta_min          2.02 
_diffrn_reflns_theta_max          22.62 
_reflns_number_total              6137 
_reflns_number_observed           5213 
_reflns_observed_criterion        >2sigma(I) 
 
_computing_data_collection        MADNES 
_computing_cell_refinement        MADNES 
_computing_data_reduction         PROCOR 
_computing_structure_solution     'SHELXS-97 (Sheldrick, 1990)' 
_computing_structure_refinement   'SHELXL-97 (Sheldrick, 1997)' 
_computing_molecular_graphics     'XP (Siemens, 1990)' 
_computing_publication_material   'SHELXL-97 (Sheldrick, 1997)' 
 
_refine_special_details 
; 
 Refinement on F^2^ for ALL reflections except for 5 with very negative F^2^ 
 or flagged by the user for potential systematic errors.  Weighted R-factors 
 wR and all goodnesses of fit S are based on F^2^, conventional R-factors R 
 are based on F, with F set to zero for negative F^2^. The observed criterion 
 of F^2^ > 2sigma(F^2^) is used only for calculating -R-factor-obs etc. and is 
 not relevant to the choice of reflections for refinement.  R-factors based 
 on F^2^ are statistically about twice as large as those based on F, and R- 
 factors based on ALL data will be even larger. 
; 
 
_refine_ls_structure_factor_coef  Fsqd  
_refine_ls_matrix_type            full 
_refine_ls_weighting_scheme 
 'calc w=1/[\s^2^(Fo^2^)+(0.0523P)^2^+29.9747P] where P=(Fo^2^+2Fc^2^)/3' 
_atom_sites_solution_primary      direct 
_atom_sites_solution_secondary    difmap 
_atom_sites_solution_hydrogens    geom 
_refine_ls_hydrogen_treatment     noref 
_refine_ls_extinction_method      none 
_refine_ls_extinction_coef        ? 
_refine_ls_number_reflns          6132 
_refine_ls_number_parameters      618 
_refine_ls_number_restraints      787 
_refine_ls_R_factor_all           0.0695 
_refine_ls_R_factor_obs           0.0573 
_refine_ls_wR_factor_all          0.1443 
_refine_ls_wR_factor_obs          0.1317 
_refine_ls_goodness_of_fit_all    1.067 
_refine_ls_goodness_of_fit_obs    1.076 
_refine_ls_restrained_S_all       1.078 
_refine_ls_restrained_S_obs       1.077 
_refine_ls_shift/esd_max          0.015 
_refine_ls_shift/esd_mean         0.000 
 
loop_ 
 _atom_site_label 
 _atom_site_type_symbol 
 _atom_site_fract_x 
 _atom_site_fract_y 
 _atom_site_fract_z 
 _atom_site_U_iso_or_equiv 
 _atom_site_thermal_displace_type 
 _atom_site_occupancy 
 _atom_site_calc_flag 
 _atom_site_refinement_flags 
 _atom_site_disorder_group 
Co1 Co 0.79939(6) 0.19326(4) 0.14113(4) 0.0168(2) Uani 1 d U . 
Co2 Co 0.82491(6) 0.23967(4) 0.24759(4) 0.0161(2) Uani 1 d U . 
Co3 Co 0.85142(6) 0.28546(4) 0.35463(4) 0.0186(2) Uani 1 d U . 
Cl1 Cl 0.77742(13) 0.14676(7) 0.03204(7) 0.0287(4) Uani 1 d U . 
Cl2 Cl 0.88036(13) 0.33174(8) 0.46416(7) 0.0322(4) Uani 1 d U . 
N1 N 0.9622(4) 0.2235(2) 0.1295(2) 0.0194(11) Uani 1 d U . 
N2 N 0.9334(4) 0.2969(2) 0.2141(2) 0.0193(11) Uani 1 d U . 
N3 N 0.9001(4) 0.3624(2) 0.3053(2) 0.0206(11) Uani 1 d U . 
N4 N 0.6434(4) 0.1675(2) 0.1713(2) 0.0194(11) Uani 1 d U . 
N5 N 0.7166(4) 0.1814(2) 0.2817(2) 0.0179(10) Uani 1 d U . 
N6 N 0.8027(4) 0.2008(2) 0.3880(2) 0.0212(11) Uani 1 d U . 
N7 N 0.8679(4) 0.1160(2) 0.1844(2) 0.0195(11) Uani 1 d U . 
N8 N 0.9456(4) 0.1813(2) 0.2694(2) 0.0178(10) Uani 1 d U . 
N9 N 1.0139(4) 0.2527(2) 0.3509(2) 0.0192(10) Uani 1 d U . 
N10 N 0.7314(4) 0.2771(2) 0.1130(2) 0.0182(10) Uani 1 d U . 
N11 N 0.7029(4) 0.2975(2) 0.2257(2) 0.0168(10) Uani 1 d U . 
N12 N 0.6851(4) 0.3125(2) 0.3406(2) 0.0188(10) Uani 1 d U . 
C1 C 1.0348(5) 0.1908(3) 0.0907(3) 0.0252(14) Uani 1 d U . 
H1A H 1.0046(5) 0.1553(3) 0.0664(3) 0.030 Uiso 1 calc R . 
C2 C 1.1513(5) 0.2066(3) 0.0846(3) 0.0287(14) Uani 1 d U . 
H2A H 1.1997(5) 0.1824(3) 0.0572(3) 0.034 Uiso 1 calc R . 
C3 C 1.1939(6) 0.2589(3) 0.1201(3) 0.0309(15) Uani 1 d U . 
H3A H 1.2722(6) 0.2718(3) 0.1157(3) 0.037 Uiso 1 calc R . 
C4 C 1.1240(5) 0.2924(3) 0.1615(3) 0.0246(14) Uani 1 d U . 
H4A H 1.1539(5) 0.3278(3) 0.1863(3) 0.030 Uiso 1 calc R . 
C5 C 1.0077(5) 0.2733(3) 0.1666(3) 0.0198(13) Uani 1 d U . 
C6 C 0.9422(5) 0.3569(3) 0.2425(3) 0.0191(13) Uani 1 d U . 
C7 C 0.9857(5) 0.4097(3) 0.2093(3) 0.0251(14) Uani 1 d U . 
H7A H 1.0172(5) 0.4049(3) 0.1666(3) 0.030 Uiso 1 calc R . 
C8 C 0.9826(6) 0.4687(3) 0.2388(3) 0.035(2) Uani 1 d U . 
H8A H 1.0127(6) 0.5045(3) 0.2167(3) 0.042 Uiso 1 calc R . 
C9 C 0.9343(6) 0.4754(3) 0.3020(3) 0.038(2) Uani 1 d U . 
H9A H 0.9295(6) 0.5157(3) 0.3227(3) 0.046 Uiso 1 calc R . 
C10 C 0.8939(5) 0.4212(3) 0.3331(3) 0.0293(15) Uani 1 d U . 
H10A H 0.8607(5) 0.4254(3) 0.3754(3) 0.035 Uiso 1 calc R . 
C11 C 0.5532(5) 0.1567(3) 0.1259(3) 0.0232(13) Uani 1 d U . 
H11A H 0.5646(5) 0.1631(3) 0.0796(3) 0.028 Uiso 1 calc R . 
C12 C 0.4445(6) 0.1366(3) 0.1452(3) 0.0314(15) Uani 1 d U . 
H12A H 0.3830(6) 0.1290(3) 0.1127(3) 0.038 Uiso 1 calc R . 
C13 C 0.4280(6) 0.1277(3) 0.2131(3) 0.0301(15) Uani 1 d U . 
H13A H 0.3555(6) 0.1127(3) 0.2272(3) 0.036 Uiso 1 calc R . 
C14 C 0.5174(5) 0.1408(3) 0.2605(3) 0.0227(13) Uani 1 d U . 
H14A H 0.5057(5) 0.1363(3) 0.3070(3) 0.027 Uiso 1 calc R . 
C15 C 0.6268(5) 0.1611(3) 0.2382(3) 0.0182(12) Uani 1 d U . 
C16 C 0.7409(5) 0.1598(3) 0.3468(3) 0.0190(13) Uani 1 d U . 
C17 C 0.7145(5) 0.0978(3) 0.3679(3) 0.0282(14) Uani 1 d U . 
H17A H 0.6718(5) 0.0699(3) 0.3386(3) 0.034 Uiso 1 calc R . 
C18 C 0.7515(6) 0.0779(3) 0.4319(3) 0.036(2) Uani 1 d U . 
H18A H 0.7332(6) 0.0367(3) 0.4470(3) 0.043 Uiso 1 calc R . 
C19 C 0.8163(6) 0.1198(3) 0.4739(3) 0.037(2) Uani 1 d U . 
H19A H 0.8431(6) 0.1072(3) 0.5176(3) 0.044 Uiso 1 calc R . 
C20 C 0.8403(5) 0.1797(3) 0.4502(3) 0.0296(15) Uani 1 d U . 
H20A H 0.8852(5) 0.2075(3) 0.4786(3) 0.036 Uiso 1 calc R . 
C21 C 0.7262(5) 0.2954(3) 0.0475(3) 0.0273(14) Uani 1 d U . 
H21A H 0.7598(5) 0.2686(3) 0.0156(3) 0.033 Uiso 1 calc R . 
C22 C 0.6744(6) 0.3512(3) 0.0251(3) 0.034(2) Uani 1 d U . 
H22A H 0.6694(6) 0.3615(3) -0.0212(3) 0.041 Uiso 1 calc R . 
C23 C 0.6294(6) 0.3919(3) 0.0726(3) 0.034(2) Uani 1 d U . 
H23A H 0.5945(6) 0.4308(3) 0.0588(3) 0.041 Uiso 1 calc R . 
C24 C 0.6361(5) 0.3755(3) 0.1397(3) 0.0281(14) Uani 1 d U . 
H24A H 0.6068(5) 0.4033(3) 0.1722(3) 0.034 Uiso 1 calc R . 
C25 C 0.6870(5) 0.3170(3) 0.1595(3) 0.0183(12) Uani 1 d U . 
C26 C 0.6333(5) 0.3166(3) 0.2777(3) 0.0189(12) Uani 1 d U . 
C27 C 0.5163(5) 0.3339(3) 0.2678(3) 0.0210(13) Uani 1 d U . 
H27A H 0.4814(5) 0.3353(3) 0.2236(3) 0.025 Uiso 1 calc R . 
C28 C 0.4509(6) 0.3490(3) 0.3223(3) 0.0283(14) Uani 1 d U . 
H28A H 0.3722(6) 0.3619(3) 0.3157(3) 0.034 Uiso 1 calc R . 
C29 C 0.5034(5) 0.3447(3) 0.3871(3) 0.0296(15) Uani 1 d U . 
H29A H 0.4609(5) 0.3546(3) 0.4252(3) 0.036 Uiso 1 calc R . 
C30 C 0.6199(5) 0.3257(3) 0.3944(3) 0.0245(14) Uani 1 d U . 
H30A H 0.6550(5) 0.3218(3) 0.4383(3) 0.029 Uiso 1 calc R . 
C31 C 0.8481(5) 0.0576(3) 0.1574(3) 0.0253(14) Uani 1 d U . 
H31A H 0.7968(5) 0.0540(3) 0.1188(3) 0.030 Uiso 1 calc R . 
C32 C 0.8995(6) 0.0035(3) 0.1837(3) 0.032(2) Uani 1 d U . 
H32A H 0.8849(6) -0.0364(3) 0.1629(3) 0.038 Uiso 1 calc R . 
C33 C 0.9733(5) 0.0080(3) 0.2415(3) 0.0292(15) Uani 1 d U . 
H33A H 1.0112(5) -0.0285(3) 0.2598(3) 0.035 Uiso 1 calc R . 
C34 C 0.9900(5) 0.0666(3) 0.2715(3) 0.0262(14) Uani 1 d U . 
H34A H 1.0361(5) 0.0702(3) 0.3121(3) 0.031 Uiso 1 calc R . 
C35 C 0.9384(5) 0.1208(3) 0.2416(3) 0.0186(12) Uani 1 d U . 
C36 C 1.0387(5) 0.2027(3) 0.3102(3) 0.0200(13) Uani 1 d U . 
C37 C 1.1533(5) 0.1805(3) 0.3063(3) 0.0291(14) Uani 1 d U . 
H37A H 1.1692(5) 0.1453(3) 0.2787(3) 0.035 Uiso 1 calc R . 
C38 C 1.2428(6) 0.2103(3) 0.3430(3) 0.032(2) Uani 1 d U . 
H38A H 1.3204(6) 0.1955(3) 0.3408(3) 0.039 Uiso 1 calc R . 
C39 C 1.2185(5) 0.2622(3) 0.3832(3) 0.0266(14) Uani 1 d U . 
H39A H 1.2789(5) 0.2835(3) 0.4083(3) 0.032 Uiso 1 calc R . 
C40 C 1.1037(5) 0.2819(3) 0.3856(3) 0.0236(13) Uani 1 d U . 
H40A H 1.0870(5) 0.3174(3) 0.4126(3) 0.028 Uiso 1 calc R . 
B1 B 0.7800(8) 0.0391(4) 0.6470(4) 0.042(2) Uani 1 d U . 
F1 F 0.8145(5) 0.0880(3) 0.6898(3) 0.098(2) Uani 1 d U . 
F2 F 0.8717(5) 0.0206(3) 0.6096(3) 0.082(2) Uani 1 d U . 
F3 F 0.7472(4) -0.0118(2) 0.6848(2) 0.0598(12) Uani 1 d U . 
F4 F 0.6876(3) 0.0599(2) 0.6043(2) 0.0448(10) Uani 1 d U . 
C1S C 0.4857(7) 0.1187(4) 0.5038(4) 0.049(2) Uani 1 d U . 
Cl1S Cl 0.4191(2) 0.06327(11) 0.44723(13) 0.0680(6) Uani 1 d U . 
Cl2S Cl 0.5068(2) 0.19263(9) 0.46199(10) 0.0476(5) Uani 1 d U . 
C2S C 0.6748(26) 0.5048(19) 0.5709(10) 0.147(15) Uiso 0.40 d PD . 
Cl3S Cl 0.7212(14) 0.4630(7) 0.5148(7) 0.162(5) Uiso 0.40 d PD . 
Cl4S Cl 0.7622(8) 0.5170(4) 0.6343(4) 0.087(2) Uiso 0.40 d PD . 
Cl5S Cl 0.7263(6) 0.4954(4) 0.6392(3) 0.067(2) Uiso 0.40 d PD . 
Cl6S Cl 0.5960(10) 0.4735(5) 0.5139(5) 0.114(3) Uiso 0.40 d PD . 
C3S C 0.7721(15) 0.5002(11) 0.5532(11) 0.099(6) Uiso 0.60 d PD 3 
Cl8S Cl 0.9147(21) 0.5071(13) 0.5207(13) 0.166(9) Uiso 0.20 d PD 3 
Cl7S Cl 0.6545(12) 0.4611(5) 0.5047(5) 0.047(2) Uiso 0.20 d PD 3 
 
loop_ 
 _atom_site_aniso_label 
 _atom_site_aniso_U_11 
 _atom_site_aniso_U_22 
 _atom_site_aniso_U_33 
 _atom_site_aniso_U_23 
 _atom_site_aniso_U_13 
 _atom_site_aniso_U_12 
Co1 0.0149(4) 0.0182(4) 0.0172(4) -0.0009(3) 0.0006(3) 0.0020(3) 
Co2 0.0124(4) 0.0190(4) 0.0168(4) -0.0009(3) 0.0015(3) 0.0008(3) 
Co3 0.0131(4) 0.0249(4) 0.0181(4) -0.0025(3) 0.0026(3) -0.0011(3) 
Cl1 0.0316(8) 0.0314(8) 0.0229(8) -0.0033(6) -0.0008(6) 0.0037(7) 
Cl2 0.0236(8) 0.0496(10) 0.0237(8) -0.0096(7) 0.0037(6) -0.0044(7) 
N1 0.0189(15) 0.020(2) 0.0189(15) 0.0004(12) 0.0021(12) 0.0029(12) 
N2 0.0184(15) 0.020(2) 0.0195(15) -0.0009(12) 0.0032(12) -0.0004(12) 
N3 0.020(2) 0.021(2) 0.021(2) -0.0027(12) 0.0013(12) -0.0010(12) 
N4 0.0187(15) 0.019(2) 0.0206(15) -0.0004(12) -0.0009(12) 0.0002(12) 
N5 0.0160(15) 0.0187(15) 0.0189(15) 0.0010(12) 0.0011(12) -0.0011(12) 
N6 0.020(2) 0.023(2) 0.021(2) 0.0002(12) 0.0031(12) 0.0009(12) 
N7 0.0192(15) 0.019(2) 0.0199(15) -0.0007(12) 0.0013(12) 0.0006(12) 
N8 0.0165(15) 0.0188(15) 0.0180(15) -0.0003(12) 0.0005(12) 0.0005(12) 
N9 0.0182(15) 0.021(2) 0.0185(15) 0.0000(12) 0.0007(12) -0.0009(12) 
N10 0.0179(15) 0.0189(15) 0.0180(15) -0.0007(12) 0.0011(12) 0.0007(12) 
N11 0.0156(15) 0.0174(15) 0.0176(15) -0.0004(12) 0.0021(12) 0.0013(12) 
N12 0.0180(15) 0.019(2) 0.0193(15) -0.0016(12) 0.0028(12) 0.0000(12) 
C1 0.025(2) 0.026(2) 0.025(2) -0.0006(13) 0.0014(13) 0.0024(13) 
C2 0.028(2) 0.030(2) 0.028(2) -0.0001(13) 0.0027(13) 0.0029(13) 
C3 0.029(2) 0.033(2) 0.031(2) 0.0013(13) 0.0030(13) 0.0005(13) 
C4 0.024(2) 0.025(2) 0.025(2) 0.0001(13) 0.0024(13) -0.0005(13) 
C5 0.018(2) 0.021(2) 0.020(2) 0.0009(13) 0.0022(13) 0.0008(13) 
C6 0.017(2) 0.019(2) 0.020(2) -0.0001(13) 0.0010(13) 0.0005(13) 
C7 0.025(2) 0.025(2) 0.025(2) -0.0005(13) 0.0027(13) -0.0004(13) 
C8 0.035(2) 0.034(2) 0.036(2) 0.0006(13) 0.0029(13) -0.0004(13) 
C9 0.039(2) 0.037(2) 0.040(2) -0.0022(14) 0.0036(14) -0.0009(14) 
C10 0.029(2) 0.029(2) 0.030(2) -0.0023(13) 0.0030(13) -0.0007(13) 
C11 0.023(2) 0.023(2) 0.024(2) -0.0009(13) 0.0007(13) 0.0004(13) 
C12 0.030(2) 0.031(2) 0.032(2) -0.0009(13) -0.0011(13) 0.0000(13) 
C13 0.028(2) 0.030(2) 0.032(2) -0.0005(13) 0.0017(13) 0.0003(13) 
C14 0.022(2) 0.023(2) 0.024(2) -0.0009(13) 0.0022(13) -0.0001(13) 
C15 0.018(2) 0.017(2) 0.019(2) -0.0001(13) 0.0001(13) 0.0008(13) 
C16 0.017(2) 0.020(2) 0.020(2) 0.0003(13) 0.0031(13) 0.0016(13) 
C17 0.028(2) 0.028(2) 0.029(2) 0.0008(13) 0.0017(13) 0.0002(13) 
C18 0.035(2) 0.036(2) 0.036(2) 0.0030(13) 0.0033(13) 0.0004(14) 
C19 0.036(2) 0.039(2) 0.036(2) 0.0031(14) 0.0027(13) 0.0009(14) 
C20 0.029(2) 0.032(2) 0.028(2) 0.0015(13) 0.0021(13) -0.0002(13) 
C21 0.027(2) 0.028(2) 0.027(2) 0.0007(13) 0.0018(13) 0.0014(13) 
C22 0.034(2) 0.034(2) 0.033(2) 0.0029(13) 0.0017(13) 0.0003(14) 
C23 0.034(2) 0.034(2) 0.034(2) 0.0030(13) 0.0017(13) 0.0010(13) 
C24 0.029(2) 0.028(2) 0.028(2) 0.0002(13) 0.0022(13) 0.0012(13) 
C25 0.017(2) 0.019(2) 0.019(2) -0.0003(13) 0.0019(13) 0.0001(13) 
C26 0.019(2) 0.018(2) 0.019(2) -0.0005(13) 0.0021(13) 0.0006(13) 
C27 0.020(2) 0.021(2) 0.022(2) 0.0008(13) 0.0014(13) 0.0006(13) 
C28 0.027(2) 0.028(2) 0.030(2) 0.0003(13) 0.0025(13) 0.0002(13) 
C29 0.029(2) 0.030(2) 0.030(2) -0.0006(13) 0.0048(13) 0.0001(13) 
C30 0.024(2) 0.025(2) 0.024(2) -0.0009(13) 0.0028(13) -0.0017(13) 
C31 0.025(2) 0.025(2) 0.025(2) -0.0001(13) 0.0004(13) 0.0005(13) 
C32 0.033(2) 0.030(2) 0.033(2) -0.0008(13) 0.0012(13) 0.0001(13) 
C33 0.029(2) 0.028(2) 0.030(2) 0.0013(13) 0.0019(13) 0.0019(13) 
C34 0.025(2) 0.027(2) 0.026(2) 0.0000(13) 0.0008(13) 0.0011(13) 
C35 0.017(2) 0.019(2) 0.020(2) 0.0006(13) 0.0013(13) 0.0009(13) 
C36 0.020(2) 0.021(2) 0.020(2) 0.0006(13) 0.0006(13) 0.0002(13) 
C37 0.028(2) 0.031(2) 0.029(2) -0.0018(13) 0.0009(13) 0.0020(13) 
C38 0.029(2) 0.035(2) 0.032(2) -0.0002(13) 0.0019(13) 0.0009(13) 
C39 0.025(2) 0.029(2) 0.026(2) 0.0002(13) 0.0012(13) -0.0017(13) 
C40 0.023(2) 0.025(2) 0.023(2) -0.0002(13) 0.0019(13) -0.0005(13) 
B1 0.041(2) 0.042(2) 0.043(2) 0.0004(14) 0.0013(14) 0.0009(14) 
F1 0.095(3) 0.089(3) 0.108(3) -0.005(2) -0.028(2) 0.003(2) 
F2 0.070(2) 0.094(3) 0.084(3) 0.024(2) 0.018(2) 0.018(2) 
F3 0.056(2) 0.065(2) 0.059(2) 0.013(2) 0.003(2) 0.002(2) 
F4 0.038(2) 0.052(2) 0.044(2) 0.002(2) -0.007(2) 0.009(2) 
C1S 0.048(2) 0.049(2) 0.049(2) 0.0011(14) 0.0012(14) 0.0004(14) 
Cl1S 0.0625(13) 0.0511(12) 0.0903(15) -0.0099(11) 0.0027(11) -0.0101(10) 
Cl2S 0.0403(10) 0.0449(10) 0.0575(11) -0.0075(9) 0.0008(8) -0.0019(8) 
 
_geom_special_details 
; 
 All esds (except the esd in the dihedral angle between two l.s. planes) 
 are estimated using the full covariance matrix.  The cell esds are taken 
 into account individually in the estimation of esds in distances, angles 
 and torsion angles; correlations between esds in cell parameters are only 
 used when they are defined by crystal symmetry.  An approximate (isotropic) 
 treatment of cell esds is used for estimating esds involving l.s. planes. 
; 
 
loop_ 
 _geom_bond_atom_site_label_1 
 _geom_bond_atom_site_label_2 
 _geom_bond_distance 
 _geom_bond_site_symmetry_2 
 _geom_bond_publ_flag 
Co1 N7 1.971(5) . ? 
Co1 N4 1.979(5) . ? 
Co1 N10 1.985(5) . ? 
Co1 N1 1.985(5) . ? 
Co1 Co2 2.3207(10) . ? 
Co1 Cl1 2.366(2) . ? 
Co2 N2 1.867(5) . ? 
Co2 N8 1.873(4) . ? 
Co2 N11 1.877(4) . ? 
Co2 N5 1.884(4) . ? 
Co2 Co3 2.3265(10) . ? 
Co3 N3 1.976(5) . ? 
Co3 N6 1.978(5) . ? 
Co3 N9 1.980(5) . ? 
Co3 N12 1.984(5) . ? 
Co3 Cl2 2.378(2) . ? 
N1 C1 1.343(7) . ? 
N1 C5 1.361(7) . ? 
N2 C6 1.376(7) . ? 
N2 C5 1.386(7) . ? 
N3 C10 1.350(8) . ? 
N3 C6 1.358(7) . ? 
N4 C11 1.348(7) . ? 
N4 C15 1.351(7) . ? 
N5 C15 1.370(7) . ? 
N5 C16 1.376(7) . ? 
N6 C16 1.354(7) . ? 
N6 C20 1.356(8) . ? 
N7 C31 1.346(8) . ? 
N7 C35 1.357(7) . ? 
N8 C36 1.374(7) . ? 
N8 C35 1.380(7) . ? 
N9 C40 1.347(7) . ? 
N9 C36 1.357(7) . ? 
N10 C21 1.347(8) . ? 
N10 C25 1.359(7) . ? 
N11 C25 1.373(7) . ? 
N11 C26 1.388(7) . ? 
N12 C26 1.351(7) . ? 
N12 C30 1.356(7) . ? 
C1 C2 1.380(9) . ? 
C2 C3 1.373(9) . ? 
C3 C4 1.366(9) . ? 
C4 C5 1.394(8) . ? 
C6 C7 1.389(8) . ? 
C7 C8 1.365(9) . ? 
C8 C9 1.397(9) . ? 
C9 C10 1.379(9) . ? 
C11 C12 1.381(9) . ? 
C12 C13 1.376(9) . ? 
C13 C14 1.374(9) . ? 
C14 C15 1.410(8) . ? 
C16 C17 1.400(8) . ? 
C17 C18 1.375(9) . ? 
C18 C19 1.392(10) . ? 
C19 C20 1.368(9) . ? 
C21 C22 1.370(9) . ? 
C22 C23 1.385(9) . ? 
C23 C24 1.366(9) . ? 
C24 C25 1.402(8) . ? 
C26 C27 1.385(8) . ? 
C27 C28 1.378(8) . ? 
C28 C29 1.387(9) . ? 
C29 C30 1.387(9) . ? 
C31 C32 1.365(9) . ? 
C32 C33 1.386(9) . ? 
C33 C34 1.370(9) . ? 
C34 C35 1.395(8) . ? 
C36 C37 1.392(8) . ? 
C37 C38 1.371(9) . ? 
C38 C39 1.381(9) . ? 
C39 C40 1.375(8) . ? 
B1 F3 1.364(10) . ? 
B1 F2 1.368(10) . ? 
B1 F1 1.372(10) . ? 
B1 F4 1.385(9) . ? 
C1S Cl1S 1.755(8) . ? 
C1S Cl2S 1.775(8) . ? 
C2S Cl5S 1.46(2) . ? 
C2S Cl3S 1.53(2) . ? 
C2S Cl6S 1.55(2) . ? 
C2S Cl4S 1.58(2) . ? 
C2S Cl7S 1.60(2) . ? 
Cl3S Cl6S 1.44(2) . ? 
Cl4S C3S 1.65(2) . ? 
Cl5S C3S 1.81(2) . ? 
Cl6S C3S 2.19(2) . ? 
C3S Cl8S 1.78(2) . ? 
C3S Cl7S 1.80(2) . ? 
 
loop_ 
 _geom_angle_atom_site_label_1 
 _geom_angle_atom_site_label_2 
 _geom_angle_atom_site_label_3 
 _geom_angle 
 _geom_angle_site_symmetry_1 
 _geom_angle_site_symmetry_3 
 _geom_angle_publ_flag 
N7 Co1 N4 89.3(2) . . ? 
N7 Co1 N10 170.5(2) . . ? 
N4 Co1 N10 88.9(2) . . ? 
N7 Co1 N1 87.7(2) . . ? 
N4 Co1 N1 169.0(2) . . ? 
N10 Co1 N1 92.3(2) . . ? 
N7 Co1 Co2 85.51(13) . . ? 
N4 Co1 Co2 85.07(13) . . ? 
N10 Co1 Co2 85.03(13) . . ? 
N1 Co1 Co2 84.11(13) . . ? 
N7 Co1 Cl1 94.52(14) . . ? 
N4 Co1 Cl1 96.17(14) . . ? 
N10 Co1 Cl1 94.96(13) . . ? 
N1 Co1 Cl1 94.66(14) . . ? 
Co2 Co1 Cl1 178.76(5) . . ? 
N2 Co2 N8 90.4(2) . . ? 
N2 Co2 N11 90.1(2) . . ? 
N8 Co2 N11 179.4(2) . . ? 
N2 Co2 N5 179.5(2) . . ? 
N8 Co2 N5 89.1(2) . . ? 
N11 Co2 N5 90.4(2) . . ? 
N2 Co2 Co1 90.06(14) . . ? 
N8 Co2 Co1 89.53(14) . . ? 
N11 Co2 Co1 90.24(14) . . ? 
N5 Co2 Co1 90.01(14) . . ? 
N2 Co2 Co3 90.07(14) . . ? 
N8 Co2 Co3 90.00(14) . . ? 
N11 Co2 Co3 90.22(14) . . ? 
N5 Co2 Co3 89.85(14) . . ? 
Co1 Co2 Co3 179.52(4) . . ? 
N3 Co3 N6 169.7(2) . . ? 
N3 Co3 N9 88.7(2) . . ? 
N6 Co3 N9 88.9(2) . . ? 
N3 Co3 N12 89.4(2) . . ? 
N6 Co3 N12 91.1(2) . . ? 
N9 Co3 N12 169.3(2) . . ? 
N3 Co3 Co2 85.03(13) . . ? 
N6 Co3 Co2 84.75(14) . . ? 
N9 Co3 Co2 84.37(13) . . ? 
N12 Co3 Co2 84.95(13) . . ? 
N3 Co3 Cl2 95.05(14) . . ? 
N6 Co3 Cl2 95.15(14) . . ? 
N9 Co3 Cl2 95.07(14) . . ? 
N12 Co3 Cl2 95.62(14) . . ? 
Co2 Co3 Cl2 179.43(5) . . ? 
C1 N1 C5 117.9(5) . . ? 
C1 N1 Co1 120.8(4) . . ? 
C5 N1 Co1 120.9(4) . . ? 
C6 N2 C5 124.4(5) . . ? 
C6 N2 Co2 118.4(4) . . ? 
C5 N2 Co2 116.8(4) . . ? 
C10 N3 C6 118.5(5) . . ? 
C10 N3 Co3 121.3(4) . . ? 
C6 N3 Co3 120.2(4) . . ? 
C11 N4 C15 119.6(5) . . ? 
C11 N4 Co1 120.8(4) . . ? 
C15 N4 Co1 119.6(4) . . ? 
C15 N5 C16 126.3(5) . . ? 
C15 N5 Co2 117.2(4) . . ? 
C16 N5 Co2 116.2(4) . . ? 
C16 N6 C20 118.0(5) . . ? 
C16 N6 Co3 120.8(4) . . ? 
C20 N6 Co3 120.8(4) . . ? 
C31 N7 C35 118.5(5) . . ? 
C31 N7 Co1 121.2(4) . . ? 
C35 N7 Co1 120.3(4) . . ? 
C36 N8 C35 124.1(5) . . ? 
C36 N8 Co2 117.3(4) . . ? 
C35 N8 Co2 118.6(4) . . ? 
C40 N9 C36 118.3(5) . . ? 
C40 N9 Co3 120.8(4) . . ? 
C36 N9 Co3 120.8(4) . . ? 
C21 N10 C25 118.4(5) . . ? 
C21 N10 Co1 121.2(4) . . ? 
C25 N10 Co1 120.4(4) . . ? 
C25 N11 C26 124.5(5) . . ? 
C25 N11 Co2 118.0(4) . . ? 
C26 N11 Co2 117.4(4) . . ? 
C26 N12 C30 118.4(5) . . ? 
C26 N12 Co3 121.1(4) . . ? 
C30 N12 Co3 120.5(4) . . ? 
N1 C1 C2 123.6(6) . . ? 
C3 C2 C1 117.5(6) . . ? 
C4 C3 C2 120.8(6) . . ? 
C3 C4 C5 118.9(6) . . ? 
N1 C5 N2 114.0(5) . . ? 
N1 C5 C4 121.2(5) . . ? 
N2 C5 C4 124.3(5) . . ? 
N3 C6 N2 115.3(5) . . ? 
N3 C6 C7 120.9(5) . . ? 
N2 C6 C7 123.6(5) . . ? 
C8 C7 C6 120.0(6) . . ? 
C7 C8 C9 119.4(6) . . ? 
C10 C9 C8 118.2(6) . . ? 
N3 C10 C9 122.8(6) . . ? 
N4 C11 C12 122.2(6) . . ? 
C13 C12 C11 118.7(6) . . ? 
C14 C13 C12 120.2(6) . . ? 
C13 C14 C15 119.0(5) . . ? 
N4 C15 N5 116.5(5) . . ? 
N4 C15 C14 120.4(5) . . ? 
N5 C15 C14 122.8(5) . . ? 
N6 C16 N5 115.2(5) . . ? 
N6 C16 C17 121.3(5) . . ? 
N5 C16 C17 123.2(5) . . ? 
C18 C17 C16 119.6(6) . . ? 
C17 C18 C19 119.0(6) . . ? 
C20 C19 C18 118.8(6) . . ? 
N6 C20 C19 123.3(6) . . ? 
N10 C21 C22 123.3(6) . . ? 
C21 C22 C23 118.3(6) . . ? 
C24 C23 C22 119.9(6) . . ? 
C23 C24 C25 119.5(6) . . ? 
N10 C25 N11 115.3(5) . . ? 
N10 C25 C24 120.7(5) . . ? 
N11 C25 C24 123.9(5) . . ? 
N12 C26 C27 121.3(5) . . ? 
N12 C26 N11 115.0(5) . . ? 
C27 C26 N11 123.6(5) . . ? 
C28 C27 C26 120.3(5) . . ? 
C27 C28 C29 118.8(6) . . ? 
C30 C29 C28 118.6(6) . . ? 
N12 C30 C29 122.6(5) . . ? 
N7 C31 C32 122.8(6) . . ? 
C31 C32 C33 119.1(6) . . ? 
C34 C33 C32 118.8(6) . . ? 
C33 C34 C35 119.9(6) . . ? 
N7 C35 N8 114.8(5) . . ? 
N7 C35 C34 120.7(5) . . ? 
N8 C35 C34 124.3(5) . . ? 
N9 C36 N8 114.9(5) . . ? 
N9 C36 C37 120.9(5) . . ? 
N8 C36 C37 123.9(5) . . ? 
C38 C37 C36 119.6(6) . . ? 
C37 C38 C39 119.7(6) . . ? 
C40 C39 C38 118.3(6) . . ? 
N9 C40 C39 123.2(6) . . ? 
F3 B1 F2 108.2(7) . . ? 
F3 B1 F1 108.8(7) . . ? 
F2 B1 F1 110.0(7) . . ? 
F3 B1 F4 110.9(7) . . ? 
F2 B1 F4 109.8(7) . . ? 
F1 B1 F4 109.1(7) . . ? 
Cl1S C1S Cl2S 110.1(4) . . ? 
Cl5S C2S Cl3S 117.2(25) . . ? 
C3S C2S Cl6S 105.6(18) . . ? 
Cl3S C2S Cl4S 116.1(21) . . ? 
Cl5S C2S Cl7S 135.5(28) . . ? 
Cl3S C3S Cl4S 133.6(17) . . ? 
Cl3S C3S Cl8S 103.9(18) . . ? 
Cl4S C3S Cl8S 116.2(14) . . ? 
Cl4S C3S Cl7S 121.7(12) . . ? 
Cl8S C3S Cl7S 120.7(16) . . ? 
Cl3S C3S Cl5S 113.6(15) . . ? 
Cl7S C3S Cl5S 103.4(10) . . ? 
Cl4S C3S Cl6S 106.9(10) . . ? 
 
_refine_diff_density_max    1.201 
_refine_diff_density_min   -0.637 
_refine_diff_density_rms    0.107 

#===END 

#===CIF for 2 at 300 K======Cotton, F. A. et al======== 
 
data_300K 
 
_audit_creation_method            SHELXL 
_chemical_name_systematic 
; 
 ? 
; 
_chemical_name_common             ? 
_chemical_formula_moiety          ? 
_chemical_formula_structural      '[Co3(N3C10H8)4Cl2][BF4]1.125CH2Cl2' 
_chemical_formula_analytical      ? 
_chemical_formula_sum             'C41.125 H34.25 B Cl4.25 Co3 F4 N12' 
_chemical_formula_weight          1110.82 
_chemical_melting_point           ? 
_chemical_compound_source         synthesis 
 
loop_ 
 _atom_type_symbol 
 _atom_type_description 
 _atom_type_scat_dispersion_real 
 _atom_type_scat_dispersion_imag 
 _atom_type_scat_source 
 'C'  'C'   0.0033   0.0016 
 'International Tables Vol C Tables 4.2.6.8 and 6.1.1.4' 
 'H'  'H'   0.0000   0.0000 
 'International Tables Vol C Tables 4.2.6.8 and 6.1.1.4' 
 'B'  'B'   0.0013   0.0007 
 'International Tables Vol C Tables 4.2.6.8 and 6.1.1.4' 
 'N'  'N'   0.0061   0.0033 
 'International Tables Vol C Tables 4.2.6.8 and 6.1.1.4' 
 'F'  'F'   0.0171   0.0103 
 'International Tables Vol C Tables 4.2.6.8 and 6.1.1.4' 
 'Cl'  'Cl'   0.1484   0.1585 
 'International Tables Vol C Tables 4.2.6.8 and 6.1.1.4' 
 'Co'  'Co'   0.3494   0.9721 
 'International Tables Vol C Tables 4.2.6.8 and 6.1.1.4' 
 
_symmetry_cell_setting            'monoclinic' 
_symmetry_space_group_name_H-M    'P2(1)/n' 
 
loop_ 
 _symmetry_equiv_pos_as_xyz 
 'x, y, z' 
 '-x+1/2, y+1/2, -z+1/2' 
 '-x, -y, -z' 
 'x-1/2, -y-1/2, z-1/2' 
 
_cell_length_a                    11.325(1) 
_cell_length_b                    20.915(2) 
_cell_length_c                    19.786(1) 
_cell_angle_alpha                 90.00 
_cell_angle_beta                  92.951(6) 
_cell_angle_gamma                 90.00 
_cell_volume                      4680.3(7) 
_cell_formula_units_Z             4 
_cell_measurement_temperature     300(2) 
_cell_measurement_reflns_used     250 
_cell_measurement_theta_min       9.05 
_cell_measurement_theta_max       20.8 
 
_exptl_crystal_description        plates 
_exptl_crystal_colour             'dark green' 
_exptl_crystal_size_max           0.32 
_exptl_crystal_size_mid           0.26 
_exptl_crystal_size_min           0.18 
_exptl_crystal_density_meas       'not measured' 
_exptl_crystal_density_diffrn     1.576 
_exptl_crystal_density_method     ? 
_exptl_crystal_F_000              2237 
_exptl_absorpt_coefficient_mu     1.355 
_exptl_absorpt_correction_type    'none' 
_exptl_absorpt_correction_T_min   ? 
_exptl_absorpt_correction_T_max   ? 
 
_exptl_special_details 
; 
 The dichloromethane molecules are disordered.
; 
 
_diffrn_ambient_temperature       300(2) 
_diffrn_radiation_wavelength      0.71073 
_diffrn_radiation_type            MoK\a 
_diffrn_radiation_source          'fine-focus sealed tube' 
_diffrn_radiation_monochromator   graphite 
_diffrn_measurement_device     'Nonius FAST area detector'
_diffrn_measurement_method     'Ellipsoid-mask fitting'
_diffrn_standards_number       'None (area detector data)'
_diffrn_standards_interval_count  ? 
_diffrn_standards_interval_time   ? 
_diffrn_standards_decay_%         ? 
_diffrn_reflns_number             24309 
_diffrn_reflns_av_R_equivalents   0.0764 
_diffrn_reflns_av_sigmaI/netI     0.0510 
_diffrn_reflns_limit_h_min        -14 
_diffrn_reflns_limit_h_max        13 
_diffrn_reflns_limit_k_min        -26 
_diffrn_reflns_limit_k_max        24 
_diffrn_reflns_limit_l_min        -25 
_diffrn_reflns_limit_l_max        24 
_diffrn_reflns_theta_min          2.20 
_diffrn_reflns_theta_max          25.00 
_reflns_number_total              7968 
_reflns_number_observed           6411 
_reflns_observed_criterion        >2sigma(I) 
 
_computing_data_collection        MADNES 
_computing_cell_refinement        MADNES 
_computing_data_reduction         PROCOR 
_computing_structure_solution     'SHELXS-86 (Sheldrick, 1990)' 
_computing_structure_refinement   'SHELXL-93 (Sheldrick, 1993)' 
_computing_molecular_graphics     'XP (Siemens, 1990)' 
 
_refine_special_details 
; 
 Refinement on F^2^ for ALL reflections except for 95 with very negative F^2^ 
 or flagged by the user for potential systematic errors.  Weighted R-factors 
 wR and all goodnesses of fit S are based on F^2^, conventional R-factors R 
 are based on F, with F set to zero for negative F^2^. The observed criterion 
 of F^2^ > 2sigma(F^2^) is used only for calculating -R-factor-obs etc. and is 
 not relevant to the choice of reflections for refinement.  R-factors based 
 on F^2^ are statistically about twice as large as those based on F, and R- 
 factors based on ALL data will be even larger. 
; 
 
_refine_ls_structure_factor_coef  Fsqd  
_refine_ls_matrix_type            full 
_refine_ls_weighting_scheme 
 'calc w=1/[\s^2^(Fo^2^)+(0.0407P)^2^+23.2297P] where P=(Fo^2^+2Fc^2^)/3' 
_atom_sites_solution_primary      direct 
_atom_sites_solution_secondary    difmap 
_atom_sites_solution_hydrogens    geom 
_refine_ls_hydrogen_treatment     nonref
_refine_ls_extinction_method      none 
_refine_ls_extinction_coef        ? 
_refine_ls_number_reflns          7873 
_refine_ls_number_parameters      595 
_refine_ls_number_restraints      3 
_refine_ls_R_factor_all           0.0846 
_refine_ls_R_factor_obs           0.0666 
_refine_ls_wR_factor_all          0.1715 
_refine_ls_wR_factor_obs          0.1541 
_refine_ls_goodness_of_fit_all    1.054 
_refine_ls_goodness_of_fit_obs    1.093 
_refine_ls_restrained_S_all       1.085 
_refine_ls_restrained_S_obs       1.096 
_refine_ls_shift/esd_max          -0.011 
_refine_ls_shift/esd_mean         0.000 
 
loop_ 
 _atom_site_label 
 _atom_site_type_symbol 
 _atom_site_fract_x 
 _atom_site_fract_y 
 _atom_site_fract_z 
 _atom_site_U_iso_or_equiv 
 _atom_site_thermal_displace_type 
 _atom_site_occupancy 
 _atom_site_calc_flag 
 _atom_site_refinement_flags 
 _atom_site_disorder_group 
Co1 Co 0.79812(7) 0.19824(4) 0.13940(4) 0.0368(2) Uani 1 d . . 
Co2 Co 0.81855(6) 0.24659(4) 0.24516(3) 0.0328(2) Uani 1 d . . 
Co3 Co 0.84053(6) 0.29443(4) 0.35201(4) 0.0368(2) Uani 1 d . . 
Cl1 Cl 0.7790(2) 0.14857(8) 0.03251(7) 0.0537(4) Uani 1 d . . 
Cl2 Cl 0.86361(14) 0.34267(9) 0.46029(7) 0.0527(4) Uani 1 d . . 
N1 N 0.9617(4) 0.2298(2) 0.1284(2) 0.0419(11) Uani 1 d . . 
N2 N 0.9292(4) 0.3035(2) 0.2122(2) 0.0389(11) Uani 1 d . . 
N3 N 0.8930(4) 0.3708(2) 0.3008(2) 0.0420(11) Uani 1 d . . 
N4 N 0.6390(4) 0.1731(2) 0.1684(2) 0.0400(11) Uani 1 d . . 
N5 N 0.7083(4) 0.1891(2) 0.2796(2) 0.0352(10) Uani 1 d . . 
N6 N 0.7887(4) 0.2090(2) 0.3856(2) 0.0410(11) Uani 1 d . . 
N7 N 0.8660(4) 0.1209(2) 0.1851(2) 0.0387(10) Uani 1 d . . 
N8 N 0.9397(4) 0.1889(2) 0.2692(2) 0.0343(10) Uani 1 d . . 
N9 N 1.0049(4) 0.2616(2) 0.3505(2) 0.0372(10) Uani 1 d . . 
N10 N 0.7327(4) 0.2822(2) 0.1091(2) 0.0423(11) Uani 1 d . . 
N11 N 0.6971(4) 0.3046(2) 0.2207(2) 0.0370(10) Uani 1 d . . 
N12 N 0.6727(4) 0.3206(2) 0.3341(2) 0.0383(10) Uani 1 d . . 
C1 C 1.0361(6) 0.1976(4) 0.0879(3) 0.055(2) Uani 1 d . . 
H1A H 1.0081(6) 0.1616(4) 0.0646(3) 0.066 Uiso 1 calc R . 
C2 C 1.1501(6) 0.2166(4) 0.0805(3) 0.066(2) Uani 1 d . . 
H2A H 1.1978(6) 0.1949(4) 0.0513(3) 0.079 Uiso 1 calc R . 
C3 C 1.1936(6) 0.2682(4) 0.1169(4) 0.063(2) Uani 1 d . . 
H3A H 1.2712(6) 0.2816(4) 0.1126(4) 0.076 Uiso 1 calc R . 
C4 C 1.1218(5) 0.3001(3) 0.1600(3) 0.051(2) Uani 1 d . . 
H4A H 1.1507(5) 0.3345(3) 0.1856(3) 0.061 Uiso 1 calc R . 
C5 C 1.0047(5) 0.2797(3) 0.1645(3) 0.0408(13) Uani 1 d . . 
C6 C 0.9383(5) 0.3637(3) 0.2392(3) 0.0371(12) Uani 1 d . . 
C7 C 0.9818(6) 0.4168(3) 0.2050(3) 0.052(2) Uani 1 d . . 
H7A H 1.0110(6) 0.4119(3) 0.1623(3) 0.062 Uiso 1 calc R . 
C8 C 0.9812(6) 0.4763(3) 0.2350(4) 0.059(2) Uani 1 d . . 
H8A H 1.0128(6) 0.5114(3) 0.2134(4) 0.071 Uiso 1 calc R . 
C9 C 0.9336(7) 0.4832(3) 0.2970(4) 0.064(2) Uani 1 d . . 
H9A H 0.9317(7) 0.5232(3) 0.3176(4) 0.077 Uiso 1 calc R . 
C10 C 0.8884(6) 0.4302(3) 0.3284(3) 0.055(2) Uani 1 d . . 
H10A H 0.8538(6) 0.4353(3) 0.3697(3) 0.066 Uiso 1 calc R . 
C11 C 0.5500(5) 0.1611(3) 0.1235(3) 0.0483(15) Uani 1 d . . 
H11A H 0.5636(5) 0.1654(3) 0.0778(3) 0.058 Uiso 1 calc R . 
C12 C 0.4403(6) 0.1428(4) 0.1411(4) 0.058(2) Uani 1 d . . 
H12A H 0.3804(6) 0.1355(4) 0.1081(4) 0.070 Uiso 1 calc R . 
C13 C 0.4197(6) 0.1354(3) 0.2086(4) 0.058(2) Uani 1 d . . 
H13A H 0.3466(6) 0.1211(3) 0.2218(4) 0.070 Uiso 1 calc R . 
C14 C 0.5066(5) 0.1492(3) 0.2556(3) 0.0457(14) Uani 1 d . . 
H14A H 0.4927(5) 0.1461(3) 0.3014(3) 0.055 Uiso 1 calc R . 
C15 C 0.6177(5) 0.1682(3) 0.2351(3) 0.0363(12) Uani 1 d . . 
C16 C 0.7255(5) 0.1690(3) 0.3447(3) 0.0396(13) Uani 1 d . . 
C17 C 0.6948(6) 0.1074(3) 0.3677(3) 0.057(2) Uani 1 d . . 
H17A H 0.6542(6) 0.0788(3) 0.3390(3) 0.068 Uiso 1 calc R . 
C18 C 0.7257(8) 0.0909(4) 0.4324(4) 0.077(2) Uani 1 d . . 
H18A H 0.7011(8) 0.0518(4) 0.4493(4) 0.092 Uiso 1 calc R . 
C19 C 0.7924(8) 0.1309(4) 0.4733(4) 0.074(2) Uani 1 d . . 
H19A H 0.8170(8) 0.1186(4) 0.5169(4) 0.089 Uiso 1 calc R . 
C20 C 0.8224(6) 0.1894(4) 0.4489(3) 0.056(2) Uani 1 d . . 
H20A H 0.8676(6) 0.2168(4) 0.4768(3) 0.067 Uiso 1 calc R . 
C21 C 0.7367(7) 0.3006(3) 0.0447(3) 0.061(2) Uani 1 d . . 
H21A H 0.7719(7) 0.2735(3) 0.0144(3) 0.073 Uiso 1 calc R . 
C22 C 0.6906(9) 0.3583(4) 0.0211(4) 0.082(3) Uani 1 d . . 
H22A H 0.6937(9) 0.3693(4) -0.0243(4) 0.098 Uiso 1 calc R . 
C23 C 0.6405(8) 0.3989(4) 0.0656(4) 0.076(2) Uani 1 d . . 
H23A H 0.6082(8) 0.4376(4) 0.0506(4) 0.092 Uiso 1 calc R . 
C24 C 0.6381(6) 0.3822(3) 0.1326(4) 0.060(2) Uani 1 d . . 
H24A H 0.6056(6) 0.4097(3) 0.1635(4) 0.072 Uiso 1 calc R . 
C25 C 0.6855(5) 0.3229(3) 0.1542(3) 0.0440(14) Uani 1 d . . 
C26 C 0.6242(5) 0.3240(3) 0.2707(3) 0.0366(12) Uani 1 d . . 
C27 C 0.5055(5) 0.3414(3) 0.2587(3) 0.0454(14) Uani 1 d . . 
H27A H 0.4720(5) 0.3428(3) 0.2148(3) 0.054 Uiso 1 calc R . 
C28 C 0.4388(6) 0.3564(3) 0.3131(4) 0.057(2) Uani 1 d . . 
H28A H 0.3604(6) 0.3691(3) 0.3058(4) 0.068 Uiso 1 calc R . 
C29 C 0.4874(6) 0.3527(4) 0.3774(3) 0.056(2) Uani 1 d . . 
H29A H 0.4433(6) 0.3627(4) 0.4143(3) 0.067 Uiso 1 calc R . 
C30 C 0.6021(5) 0.3338(3) 0.3863(3) 0.0451(14) Uani 1 d . . 
H30A H 0.6342(5) 0.3297(3) 0.4303(3) 0.054 Uiso 1 calc R . 
C31 C 0.8491(6) 0.0621(3) 0.1603(3) 0.0499(15) Uani 1 d . . 
H31A H 0.7997(6) 0.0572(3) 0.1217(3) 0.060 Uiso 1 calc R . 
C32 C 0.9007(6) 0.0083(3) 0.1888(4) 0.059(2) Uani 1 d . . 
H32A H 0.8874(6) -0.0318(3) 0.1696(4) 0.071 Uiso 1 calc R . 
C33 C 0.9726(6) 0.0153(3) 0.2465(4) 0.057(2) Uani 1 d . . 
H33A H 1.0105(6) -0.0200(3) 0.2662(4) 0.069 Uiso 1 calc R . 
C34 C 0.9876(6) 0.0742(3) 0.2743(3) 0.0491(15) Uani 1 d . . 
H34A H 1.0336(6) 0.0790(3) 0.3143(3) 0.059 Uiso 1 calc R . 
C35 C 0.9346(5) 0.1277(3) 0.2435(3) 0.0372(12) Uani 1 d . . 
C36 C 1.0319(5) 0.2111(3) 0.3107(3) 0.0379(12) Uani 1 d . . 
C37 C 1.1477(5) 0.1892(4) 0.3079(3) 0.056(2) Uani 1 d . . 
H37A H 1.1644(5) 0.1538(4) 0.2816(3) 0.067 Uiso 1 calc R . 
C38 C 1.2359(6) 0.2197(4) 0.3438(4) 0.063(2) Uani 1 d . . 
H38A H 1.3137(6) 0.2061(4) 0.3414(4) 0.076 Uiso 1 calc R . 
C39 C 1.2095(6) 0.2713(4) 0.3839(3) 0.057(2) Uani 1 d . . 
H39A H 1.2692(6) 0.2924(4) 0.4091(3) 0.069 Uiso 1 calc R . 
C40 C 1.0949(5) 0.2909(3) 0.3862(3) 0.0475(15) Uani 1 d . . 
H40A H 1.0778(5) 0.3258(3) 0.4132(3) 0.057 Uiso 1 calc R . 
B1 B 0.7668(11) 0.0153(8) 0.6310(6) 0.100(4) Uani 1 d . . 
F1 F 0.8032(9) 0.0645(5) 0.6672(6) 0.217(5) Uani 1 d . . 
F2 F 0.8547(7) -0.0051(5) 0.5959(4) 0.179(4) Uani 1 d . . 
F3 F 0.7411(7) -0.0325(5) 0.6736(5) 0.172(4) Uani 1 d . . 
F4 F 0.6740(6) 0.0352(4) 0.5938(3) 0.145(3) Uani 1 d . . 
Cl4S Cl 0.7846(13) 0.5190(8) 0.6245(7) 0.234(6) Uiso 0.50 d P . 
Cl5S Cl 0.7235(9) 0.4913(5) 0.6304(5) 0.158(3) Uiso 0.50 d P . 
Cl6S Cl 0.5835(13) 0.4733(7) 0.5162(7) 0.170(5) Uiso 0.40 d P . 
C2S C 0.7673(17) 0.4954(10) 0.5392(10) 0.185(7) Uiso 1 d D 3 
Cl8S Cl 0.9070(19) 0.5142(11) 0.5291(11) 0.231(8) Uiso 0.30 d PD 3 
Cl7S Cl 0.6541(25) 0.4668(12) 0.5204(12) 0.225(10) Uiso 0.30 d PD 3 
Cl1S Cl 0.4921(28) 0.1871(16) 0.4576(16) 0.144(10) Uiso 0.13 d PD . 
Cl2S Cl 0.4270(38) 0.0600(22) 0.4584(22) 0.196(16) Uiso 0.13 d PD . 
C1S C 0.4939(80) 0.1195(23) 0.5135(28) 0.111(28) Uiso 0.13 d PD . 
H1SA H 0.4475(80) 0.1272(23) 0.5525(28) 0.133 Uiso 0.13 calc PR . 
H1SB H 0.5739(80) 0.1077(23) 0.5285(28) 0.133 Uiso 0.13 calc PR . 
 
loop_ 
 _atom_site_aniso_label 
 _atom_site_aniso_U_11 
 _atom_site_aniso_U_22 
 _atom_site_aniso_U_33 
 _atom_site_aniso_U_23 
 _atom_site_aniso_U_13 
 _atom_site_aniso_U_12 
Co1 0.0446(4) 0.0342(4) 0.0315(4) -0.0016(3) 0.0017(3) 0.0046(3) 
Co2 0.0381(4) 0.0316(4) 0.0289(4) -0.0030(3) 0.0029(3) 0.0008(3) 
Co3 0.0389(4) 0.0383(5) 0.0336(4) -0.0033(3) 0.0050(3) -0.0035(3) 
Cl1 0.0750(11) 0.0507(10) 0.0349(7) -0.0065(6) -0.0025(7) 0.0097(8) 
Cl2 0.0552(9) 0.0652(11) 0.0383(7) -0.0131(7) 0.0073(6) -0.0104(7) 
N1 0.050(3) 0.045(3) 0.031(2) -0.002(2) 0.010(2) 0.005(2) 
N2 0.043(3) 0.038(3) 0.036(2) -0.003(2) 0.007(2) -0.001(2) 
N3 0.045(3) 0.039(3) 0.042(3) -0.005(2) 0.006(2) -0.004(2) 
N4 0.049(3) 0.030(3) 0.040(3) -0.007(2) -0.004(2) 0.006(2) 
N5 0.040(2) 0.032(3) 0.033(2) -0.002(2) 0.000(2) -0.004(2) 
N6 0.051(3) 0.039(3) 0.034(2) 0.001(2) 0.004(2) -0.003(2) 
N7 0.045(3) 0.029(3) 0.042(2) -0.006(2) 0.001(2) 0.003(2) 
N8 0.039(2) 0.032(3) 0.031(2) -0.004(2) -0.002(2) 0.004(2) 
N9 0.040(2) 0.043(3) 0.029(2) -0.002(2) 0.000(2) -0.007(2) 
N10 0.055(3) 0.036(3) 0.036(2) -0.001(2) 0.002(2) 0.001(2) 
N11 0.046(3) 0.033(3) 0.032(2) -0.001(2) 0.003(2) 0.003(2) 
N12 0.042(3) 0.032(3) 0.042(3) 0.001(2) 0.005(2) -0.001(2) 
C1 0.058(4) 0.063(5) 0.045(3) -0.011(3) 0.011(3) 0.010(3) 
C2 0.050(4) 0.101(6) 0.048(4) -0.010(4) 0.018(3) 0.018(4) 
C3 0.054(4) 0.080(6) 0.057(4) 0.002(4) 0.022(3) 0.001(4) 
C4 0.045(3) 0.058(4) 0.052(4) 0.001(3) 0.010(3) -0.003(3) 
C5 0.046(3) 0.042(3) 0.036(3) 0.005(3) 0.010(2) 0.003(3) 
C6 0.041(3) 0.029(3) 0.042(3) -0.001(2) 0.005(2) -0.002(2) 
C7 0.058(4) 0.041(4) 0.057(4) 0.004(3) 0.016(3) 0.001(3) 
C8 0.064(4) 0.029(4) 0.085(5) 0.006(3) 0.019(4) -0.004(3) 
C9 0.075(5) 0.032(4) 0.085(5) -0.010(3) 0.013(4) -0.004(3) 
C10 0.063(4) 0.042(4) 0.060(4) -0.014(3) 0.010(3) 0.000(3) 
C11 0.055(4) 0.047(4) 0.042(3) -0.003(3) -0.007(3) 0.006(3) 
C12 0.049(4) 0.059(5) 0.064(4) -0.014(3) -0.013(3) 0.003(3) 
C13 0.038(3) 0.059(5) 0.077(5) -0.007(4) 0.002(3) 0.001(3) 
C14 0.040(3) 0.041(4) 0.056(4) -0.006(3) 0.005(3) 0.001(3) 
C15 0.044(3) 0.023(3) 0.042(3) -0.004(2) 0.001(2) 0.005(2) 
C16 0.041(3) 0.037(3) 0.041(3) 0.000(2) 0.004(2) -0.002(2) 
C17 0.072(4) 0.048(4) 0.050(4) 0.013(3) -0.005(3) -0.011(3) 
C18 0.108(7) 0.065(5) 0.058(4) 0.019(4) 0.002(4) -0.017(5) 
C19 0.105(6) 0.071(6) 0.044(4) 0.016(4) -0.005(4) 0.001(5) 
C20 0.070(4) 0.063(5) 0.035(3) 0.003(3) 0.001(3) -0.003(3) 
C21 0.096(5) 0.053(4) 0.032(3) 0.001(3) 0.004(3) 0.009(4) 
C22 0.135(8) 0.061(5) 0.050(4) 0.020(4) 0.008(5) 0.011(5) 
C23 0.112(7) 0.055(5) 0.061(4) 0.019(4) -0.002(4) 0.023(4) 
C24 0.075(5) 0.045(4) 0.062(4) 0.012(3) 0.010(3) 0.020(3) 
C25 0.052(3) 0.043(4) 0.037(3) 0.001(3) 0.002(3) 0.005(3) 
C26 0.042(3) 0.023(3) 0.044(3) -0.005(2) 0.005(2) -0.002(2) 
C27 0.043(3) 0.039(4) 0.055(4) -0.002(3) 0.005(3) 0.000(3) 
C28 0.045(3) 0.050(4) 0.077(5) 0.002(3) 0.010(3) 0.004(3) 
C29 0.047(4) 0.069(5) 0.053(4) -0.014(3) 0.021(3) -0.006(3) 
C30 0.055(4) 0.040(4) 0.042(3) -0.004(3) 0.013(3) -0.006(3) 
C31 0.059(4) 0.041(4) 0.050(3) -0.011(3) 0.003(3) -0.004(3) 
C32 0.076(5) 0.028(3) 0.073(5) -0.007(3) -0.002(4) 0.004(3) 
C33 0.067(4) 0.037(4) 0.068(4) 0.008(3) 0.001(3) 0.012(3) 
C34 0.053(4) 0.043(4) 0.050(3) 0.003(3) -0.004(3) 0.009(3) 
C35 0.041(3) 0.034(3) 0.036(3) 0.001(2) 0.003(2) 0.003(2) 
C36 0.041(3) 0.041(3) 0.031(3) 0.002(2) 0.002(2) 0.001(2) 
C37 0.042(3) 0.070(5) 0.056(4) -0.015(3) -0.002(3) 0.006(3) 
C38 0.036(3) 0.092(6) 0.060(4) -0.008(4) -0.002(3) 0.008(3) 
C39 0.043(3) 0.089(6) 0.041(3) -0.002(3) 0.003(3) -0.013(3) 
C40 0.050(4) 0.054(4) 0.039(3) -0.005(3) 0.006(3) -0.010(3) 
B1 0.073(7) 0.145(13) 0.081(7) 0.029(8) -0.002(6) 0.034(8) 
F1 0.203(10) 0.156(9) 0.280(12) -0.059(9) -0.110(9) 0.054(7) 
F2 0.147(6) 0.238(10) 0.157(7) 0.034(7) 0.053(5) 0.085(7) 
F3 0.139(6) 0.192(9) 0.189(8) 0.099(7) 0.043(6) 0.054(6) 
F4 0.118(5) 0.197(8) 0.118(5) 0.040(5) -0.017(4) 0.058(5) 
 
_geom_special_details 
; 
 All esds (except the esd in the dihedral angle between two l.s. planes) 
 are estimated using the full covariance matrix.  The cell esds are taken 
 into account individually in the estimation of esds in distances, angles 
 and torsion angles; correlations between esds in cell parameters are only 
 used when they are defined by crystal symmetry.  An approximate (isotropic) 
 treatment of cell esds is used for estimating esds involving l.s. planes. 
; 
 
loop_ 
 _geom_bond_atom_site_label_1 
 _geom_bond_atom_site_label_2 
 _geom_bond_distance 
 _geom_bond_site_symmetry_2 
 _geom_bond_publ_flag 
Co1 N10 1.986(5) . ? 
Co1 N1 1.989(5) . ? 
Co1 N7 1.989(5) . ? 
Co1 N4 1.990(5) . ? 
Co1 Co2 2.3249(10) . ? 
Co1 Cl1 2.356(2) . ? 
Co2 N2 1.869(5) . ? 
Co2 N8 1.870(4) . ? 
Co2 N11 1.879(5) . ? 
Co2 N5 1.886(4) . ? 
Co2 Co3 2.3407(10) . ? 
Co3 N9 1.985(5) . ? 
Co3 N12 1.992(5) . ? 
Co3 N3 1.999(5) . ? 
Co3 N6 2.006(5) . ? 
Co3 Cl2 2.370(2) . ? 
N1 C5 1.342(8) . ? 
N1 C1 1.370(7) . ? 
N2 C6 1.370(7) . ? 
N2 C5 1.398(7) . ? 
N3 C6 1.355(7) . ? 
N3 C10 1.359(8) . ? 
N4 C11 1.332(7) . ? 
N4 C15 1.357(7) . ? 
N5 C16 1.359(7) . ? 
N5 C15 1.388(7) . ? 
N6 C16 1.345(7) . ? 
N6 C20 1.353(8) . ? 
N7 C31 1.334(8) . ? 
N7 C35 1.366(7) . ? 
N8 C36 1.375(7) . ? 
N8 C35 1.378(7) . ? 
N9 C40 1.356(7) . ? 
N9 C36 1.362(7) . ? 
N10 C21 1.333(8) . ? 
N10 C25 1.362(7) . ? 
N11 C25 1.371(7) . ? 
N11 C26 1.381(7) . ? 
N12 C26 1.345(7) . ? 
N12 C30 1.365(7) . ? 
C1 C2 1.366(10) . ? 
C2 C3 1.374(11) . ? 
C3 C4 1.380(9) . ? 
C4 C5 1.400(8) . ? 
C6 C7 1.402(8) . ? 
C7 C8 1.379(9) . ? 
C8 C9 1.372(10) . ? 
C9 C10 1.382(10) . ? 
C11 C12 1.362(9) . ? 
C12 C13 1.377(10) . ? 
C13 C14 1.350(9) . ? 
C14 C15 1.400(8) . ? 
C16 C17 1.416(9) . ? 
C17 C18 1.355(10) . ? 
C18 C19 1.365(11) . ? 
C19 C20 1.364(10) . ? 
C21 C22 1.387(10) . ? 
C22 C23 1.367(11) . ? 
C23 C24 1.373(10) . ? 
C24 C25 1.408(9) . ? 
C26 C27 1.402(8) . ? 
C27 C28 1.383(9) . ? 
C28 C29 1.363(10) . ? 
C29 C30 1.361(9) . ? 
C31 C32 1.374(9) . ? 
C32 C33 1.374(10) . ? 
C33 C34 1.357(9) . ? 
C34 C35 1.396(8) . ? 
C36 C37 1.392(8) . ? 
C37 C38 1.355(9) . ? 
C38 C39 1.381(10) . ? 
C39 C40 1.364(9) . ? 
B1 F1 1.31(2) . ? 
B1 F2 1.313(13) . ? 
B1 F4 1.319(12) . ? 
B1 F3 1.35(2) . ? 
Cl4S C2S 1.76(2) . ? 
Cl5S C2S 1.90(2) . ? 
Cl6S C2S 2.16(2) . ? 
C2S Cl7S 1.45(2) . ? 
C2S Cl8S 1.65(2) . ? 
Cl1S C1S 1.79(3) . ? 
Cl2S C1S 1.79(3) . ? 
 
loop_ 
 _geom_angle_atom_site_label_1 
 _geom_angle_atom_site_label_2 
 _geom_angle_atom_site_label_3 
 _geom_angle 
 _geom_angle_site_symmetry_1 
 _geom_angle_site_symmetry_3 
 _geom_angle_publ_flag 
N10 Co1 N1 90.5(2) . . ? 
N10 Co1 N7 170.4(2) . . ? 
N1 Co1 N7 88.8(2) . . ? 
N10 Co1 N4 89.5(2) . . ? 
N1 Co1 N4 169.0(2) . . ? 
N7 Co1 N4 89.3(2) . . ? 
N10 Co1 Co2 84.58(14) . . ? 
N1 Co1 Co2 84.46(13) . . ? 
N7 Co1 Co2 85.79(13) . . ? 
N4 Co1 Co2 84.56(13) . . ? 
N10 Co1 Cl1 95.92(14) . . ? 
N1 Co1 Cl1 95.26(14) . . ? 
N7 Co1 Cl1 93.71(14) . . ? 
N4 Co1 Cl1 95.71(14) . . ? 
Co2 Co1 Cl1 179.44(6) . . ? 
N2 Co2 N8 90.2(2) . . ? 
N2 Co2 N11 89.7(2) . . ? 
N8 Co2 N11 179.8(2) . . ? 
N2 Co2 N5 179.1(2) . . ? 
N8 Co2 N5 89.3(2) . . ? 
N11 Co2 N5 90.9(2) . . ? 
N2 Co2 Co1 90.03(14) . . ? 
N8 Co2 Co1 89.22(13) . . ? 
N11 Co2 Co1 90.69(14) . . ? 
N5 Co2 Co1 90.63(13) . . ? 
N2 Co2 Co3 90.05(14) . . ? 
N8 Co2 Co3 90.18(13) . . ? 
N11 Co2 Co3 89.91(14) . . ? 
N5 Co2 Co3 89.29(13) . . ? 
Co1 Co2 Co3 179.39(4) . . ? 
N9 Co3 N12 168.2(2) . . ? 
N9 Co3 N3 88.0(2) . . ? 
N12 Co3 N3 89.8(2) . . ? 
N9 Co3 N6 89.3(2) . . ? 
N12 Co3 N6 90.6(2) . . ? 
N3 Co3 N6 168.6(2) . . ? 
N9 Co3 Co2 83.97(13) . . ? 
N12 Co3 Co2 84.31(14) . . ? 
N3 Co3 Co2 84.51(14) . . ? 
N6 Co3 Co2 84.22(13) . . ? 
N9 Co3 Cl2 95.79(13) . . ? 
N12 Co3 Cl2 95.93(14) . . ? 
N3 Co3 Cl2 95.52(14) . . ? 
N6 Co3 Cl2 95.75(14) . . ? 
Co2 Co3 Cl2 179.75(6) . . ? 
C5 N1 C1 118.4(5) . . ? 
C5 N1 Co1 121.0(4) . . ? 
C1 N1 Co1 120.3(5) . . ? 
C6 N2 C5 123.6(5) . . ? 
C6 N2 Co2 119.2(4) . . ? 
C5 N2 Co2 117.0(4) . . ? 
C6 N3 C10 119.1(5) . . ? 
C6 N3 Co3 120.3(4) . . ? 
C10 N3 Co3 120.5(4) . . ? 
C11 N4 C15 117.9(5) . . ? 
C11 N4 Co1 121.5(4) . . ? 
C15 N4 Co1 120.6(4) . . ? 
C16 N5 C15 124.7(5) . . ? 
C16 N5 Co2 118.3(4) . . ? 
C15 N5 Co2 116.9(4) . . ? 
C16 N6 C20 119.1(5) . . ? 
C16 N6 Co3 120.7(4) . . ? 
C20 N6 Co3 120.2(4) . . ? 
C31 N7 C35 118.2(5) . . ? 
C31 N7 Co1 122.6(4) . . ? 
C35 N7 Co1 119.2(4) . . ? 
C36 N8 C35 123.4(5) . . ? 
C36 N8 Co2 117.3(4) . . ? 
C35 N8 Co2 119.3(4) . . ? 
C40 N9 C36 117.8(5) . . ? 
C40 N9 Co3 121.1(4) . . ? 
C36 N9 Co3 121.1(4) . . ? 
C21 N10 C25 118.6(5) . . ? 
C21 N10 Co1 120.9(4) . . ? 
C25 N10 Co1 120.5(4) . . ? 
C25 N11 C26 125.1(5) . . ? 
C25 N11 Co2 117.4(4) . . ? 
C26 N11 Co2 117.5(4) . . ? 
C26 N12 C30 117.9(5) . . ? 
C26 N12 Co3 121.3(4) . . ? 
C30 N12 Co3 120.8(4) . . ? 
C2 C1 N1 122.2(7) . . ? 
C1 C2 C3 119.2(6) . . ? 
C2 C3 C4 119.8(7) . . ? 
C3 C4 C5 118.8(7) . . ? 
N1 C5 N2 114.7(5) . . ? 
N1 C5 C4 121.5(5) . . ? 
N2 C5 C4 123.3(6) . . ? 
N3 C6 N2 115.2(5) . . ? 
N3 C6 C7 120.4(5) . . ? 
N2 C6 C7 124.2(5) . . ? 
C8 C7 C6 119.8(6) . . ? 
C9 C8 C7 119.4(6) . . ? 
C8 C9 C10 119.2(6) . . ? 
N3 C10 C9 122.0(6) . . ? 
N4 C11 C12 123.5(6) . . ? 
C11 C12 C13 118.8(6) . . ? 
C14 C13 C12 119.4(6) . . ? 
C13 C14 C15 119.7(6) . . ? 
N4 C15 N5 115.5(5) . . ? 
N4 C15 C14 120.8(5) . . ? 
N5 C15 C14 123.4(5) . . ? 
N6 C16 N5 115.1(5) . . ? 
N6 C16 C17 120.2(5) . . ? 
N5 C16 C17 124.1(5) . . ? 
C18 C17 C16 118.7(7) . . ? 
C17 C18 C19 120.7(7) . . ? 
C20 C19 C18 118.8(7) . . ? 
N6 C20 C19 122.3(7) . . ? 
N10 C21 C22 122.8(7) . . ? 
C23 C22 C21 119.0(7) . . ? 
C22 C23 C24 119.6(7) . . ? 
C23 C24 C25 119.4(7) . . ? 
N10 C25 N11 115.7(5) . . ? 
N10 C25 C24 120.5(5) . . ? 
N11 C25 C24 123.5(5) . . ? 
N12 C26 N11 114.9(5) . . ? 
N12 C26 C27 120.9(5) . . ? 
N11 C26 C27 124.0(5) . . ? 
C28 C27 C26 119.0(6) . . ? 
C29 C28 C27 120.2(6) . . ? 
C30 C29 C28 118.4(6) . . ? 
C29 C30 N12 123.6(6) . . ? 
N7 C31 C32 123.6(6) . . ? 
C31 C32 C33 118.3(6) . . ? 
C34 C33 C32 119.3(6) . . ? 
C33 C34 C35 120.6(6) . . ? 
N7 C35 N8 114.9(5) . . ? 
N7 C35 C34 119.9(5) . . ? 
N8 C35 C34 125.1(5) . . ? 
N9 C36 N8 114.8(5) . . ? 
N9 C36 C37 121.2(5) . . ? 
N8 C36 C37 123.6(5) . . ? 
C38 C37 C36 119.7(6) . . ? 
C37 C38 C39 119.6(6) . . ? 
C40 C39 C38 119.2(6) . . ? 
N9 C40 C39 122.6(6) . . ? 
F1 B1 F2 108.6(13) . . ? 
F1 B1 F4 106.0(12) . . ? 
F2 B1 F4 114.3(11) . . ? 
F1 B1 F3 108.2(12) . . ? 
F2 B1 F3 106.6(12) . . ? 
F4 B1 F3 113.0(12) . . ? 
Cl7S C2S Cl4S 114.7(17) . . ? 
Cl8S C2S Cl5S 115.1(14) . . ? 
Cl4S C2S Cl6S 108.7(11) . . ? 
Cl1S C1S Cl2S 100.4(31) . . ? 
 
_refine_diff_density_max    0.752 
_refine_diff_density_min   -0.815 
_refine_diff_density_rms    0.093 

#===END
